# 1 Transcriptomic atlas of mushroom development highlights an 2 independent origin of complex multicellularity

3 Krisztina Krizsán<sup>1</sup>, Éva Almási<sup>1</sup>, Zsolt Merényi<sup>1</sup>, Neha Sahu<sup>1</sup>, Máté Virágh<sup>1</sup>, Tamás Kószó<sup>1</sup>,  
4 Stephen Mondo<sup>2</sup>, Brigitta Kiss<sup>1</sup>, Balázs Bálint<sup>1,3</sup>, Ursula Kües<sup>4</sup>, Kerrie Barry<sup>2</sup>, Judit Cseklye<sup>3</sup>  
5 Botond Hegedűs<sup>1,5</sup>, Bernard Henrissat<sup>6</sup>, Jenifer Johnson<sup>2</sup>, Anna Lipzen<sup>2</sup>, Robin A. Ohm<sup>7</sup>, István  
6 Nagy<sup>3</sup>, Jasmyn Pangilinan<sup>2</sup>, Juying Yan<sup>2</sup>, Yi Xiong<sup>2</sup>, Igor V. Grigoriev<sup>2</sup>, David S. Hibbett<sup>8</sup>, László  
7 G. Nagy<sup>1\*</sup>

8  
9

10 *1 Synthetic and Systems Biology Unit, Institute of Biochemistry, BRC-HAS, Szeged, 6726,*  
11 *Hungary.*

12 *2 US Department of Energy (DOE) Joint Genome Institute, Walnut Creek, CA, 94598, United*  
13 *States.*

14 *3 Seqomics Ltd. Mórahalom, Mórahalom 6782, Hungary*

15 *4 Division of Molecular Wood Biotechnology and Technical Mycology, Büsgen-Institute,*  
16 *University of Göttingen, Göttingen, Germany.*

17 *5 Institute of Biophysics, BRC-HAS, Szeged, 6726, Hungary.*

18 *6 Architecture et Fonction des Macromolécules Biologiques (AFMB), UMR 7257 CNRS*  
19 *Université Aix-Marseille, 13288, Marseille, France.*

20 *7 Department of Biology, Microbiology, Utrecht University, 3584 Utrecht, The Netherlands*

21 *8 Biology Department, Clark University, 01610 Worcester MA, USA*

22  
23

24 \*To whom correspondence should be addressed: [lnagy@fun genomelab.com](mailto:lnagy@fun genomelab.com)

25  
26

27 **We constructed a reference atlas of mushroom formation based on developmental**  
28 **transcriptome data of six species and comparisons of >200 whole genomes, to elucidate**  
29 **the core genetic program of complex multicellularity and fruiting body development in**  
30 **mushroom-forming fungi (Agaricomycetes). Nearly 300 conserved gene families and >70**  
31 **functional groups contained developmentally regulated genes from five to six species,**  
32 **covering functions related to fungal cell wall (FCW) remodeling, targeted protein**  
33 **degradation, signal transduction, adhesion and small secreted proteins (including**  
34 **effector-like orphan genes). Several of these families, including F-box proteins, protein**  
35 **kinases and cadherin-like proteins, showed massive expansions in Agaricomycetes, with**  
36 **many convergently expanded in multicellular plants and/or animals too, reflecting broad**  
37 **genetic convergence among independently evolved complex multicellular lineages. This**  
38 **study provides a novel entry point to studying mushroom development and complex**  
39 **multicellularity in one of the largest clades of complex eukaryotic organisms.**

40  
41

42 Mushroom-forming fungi (Agaricomycetes, Basidiomycota) represent an independent lineage of  
43 complex multicellular organisms with a unique evolutionary history compared to complex  
44 animals, plants and stramenopiles. They comprise >21,000 species and originated ~350 million  
45 years ago<sup>1</sup>, approximately coinciding with the origin of tetrapods. Mushrooms have immense  
46 importance in agriculture, ecology and medicine; they represent an important and sustainable  
47 food source, with favorable medicinal properties (e.g. antitumor, immunomodulatory)<sup>2</sup>.

48 Complex multicellular development in fungi has been subject to surprisingly few  
49 studies<sup>3-6</sup>, resulting in a paucity of information on the genetic underpinnings of the independent  
50 origins of complex multicellularity in fungi<sup>7</sup>. As complex multicellular structures, fruiting bodies  
51 deploy mechanisms for hypha-to-hypha adhesion, communication, cell differentiation, defense  
52 and execute a developmental program that results in a genetically determined shape and  
53 size<sup>6,7</sup>. Fruiting bodies shelter and protect reproductive cells and facilitate spore dispersal.  
54 Uniquely, complex multicellularity in fungi comprises short-lived reproductive organs whereas in  
55 animals and plants it comprises the reproducing individual. Nevertheless, fruiting bodies evolved  
56 complexity levels comparable to that of simple animals, with up to 30 morphologically  
57 distinguishable cell types described so far. Fruiting body development is triggered by changing  
58 environmental variables (e.g. nutrient availability), and involves a transition from simple  
59 multicellular hyphae to a complex multicellular fruiting body initial. The initial follows genetically  
60 encoded programs to develop species-specific morphologies<sup>5,6</sup>, which in the Agaricomycetes  
61 ranges from simple crust-like forms (e.g. *Phanerochaete*) to the most complex toadstools (e.g.  
62 *Agaricus bisporus*). Previous studies identified several developmental genes, including  
63 hydrophobins<sup>8</sup>, defense-related proteins<sup>9</sup>, fungal cell wall (FCW) modifying enzymes<sup>10-13</sup>,  
64 transcriptional regulators<sup>4,5,14</sup> (e.g. mating genes) and light receptors<sup>15</sup> (e.g. white collar  
65 complex). It is not known, however, what genes comprise the 'core toolkit' of multicellularity and  
66 development in the Agaricomycetes.

67 Here we investigate the general evolutionary and functional properties of fruiting body  
68 development and assess whether mushroom-forming fungi evolved complex multicellularity via  
69 unique or convergent solutions, compared to other complex lineages (e.g. plants, animals or  
70 brown algae). We combine comparative analyses of developmental transcriptomes of six  
71 species with comparisons of 201 whole genomes and focus on conserved developmental  
72 functions and complex multicellularity.

73

74

## 75 **Results**

76 We obtained fruiting bodies in the laboratory or from the field and profiled gene expression in 3-  
77 9 developmental stages and tissue types for *Coprinopsis cinerea* AmutBmut, *Schizophyllum*  
78 *commune* H4-8, *Phanerochaete chrysosporium* RP78, *Rickenella mellea* SZMC22713 and  
79 *Lentinus tigrinus* RLG9953-sp. We used data for *Armillaria ostoyae* C18/9 from our previous  
80 work<sup>16</sup>. We report the *de novo* draft genome of *Rickenella mellea* (Hymenochaetales), the  
81 phylogenetically most distant species from *Coprinopsis* in our dataset, spanning >200 million  
82 years of evolution<sup>1</sup>. To construct a reference atlas of mushroom development, we performed  
83 poly(A)+ RNA-Seq on Illumina platforms, in triplicates (totalling to >120 libraries, Supplementary  
84 Table 1). We obtained an average of 60.8 million reads per sample, of which on average 83.3%  
85 mapped to the genomes (Supplementary Fig 1). For each species, the first and last

86 developmental stage sampled were vegetative mycelium and mature fruiting body at the time of  
87 spore release, respectively. This spans all developmental events of fruiting bodies except  
88 senescence. Because it is difficult to align intermediate developmental stages across species,  
89 we identified developmentally regulated genes using an approach that removes developmental  
90 stage identity from the analyses (see Methods). Using this strategy, we could recover >80% of  
91 previously reported developmental genes of *Coprinopsis* (Supplementary Table 2). To more  
92 broadly infer functionalities enriched in mushroom forming fungi, we analyzed Interpro domain  
93 counts across 201 fungal genomes (including 104 Agaricomycetes), which revealed 631  
94 significantly overrepresented domains in mushroom-forming fungi ( $P < 0.01$ , Fisher exact test,  
95 abbreviated FET, Supplementary Table 3-4).

96

## 97 Dynamic reprogramming of the fungal transcriptome

98 We detected 12,003 - 17,822 expressed genes, of which 938-7,605 were developmentally  
99 regulated in the six species (Fig. 1/a, Supplementary Table 5). We found 192-7,584 genes that  
100 showed significant expression dynamics during fruiting body development ('FB' genes). Of  
101 developmentally regulated genes 188-1,856 genes were upregulated at fruiting body initiation  
102 ('FB-init' genes), which represents a transition from simple to complex multicellular organization.  
103 Only *Phanerochaete chrysosporium* had more FB-init genes than FB genes, which is consistent  
104 with its fruiting bodies being among the least complex types in the Agaricomycetes. The number  
105 of genes significantly differentially expressed (DEG) at fruiting body initiation further suggests  
106 that the transition to complex multicellularity is associated with a major reprogramming of gene  
107 expression (Supplementary Fig. 2). The largest numbers of DEGs were observed in cap and gill  
108 tissues in all four species with complex fruiting bodies. On the other hand, the expression  
109 profiles of stipes changed little relative to primordium stages of *Armillaria*, *Lentinus* and  
110 *Rickenella*, which is explained by the differentiation of the cap initial at the top of a primordial  
111 stipe, as opposed to *Coprinopsis*, in which stipe and cap differentiation happens simultaneously  
112 inside the fruiting body initial<sup>17</sup>. Many Gene Ontology (GO) terms were partitioned between  
113 vegetative mycelium and fruiting body samples ( $P < 0.05$ , FET). Terms related to fungal cell wall,  
114 oxidoreductase activity and carbohydrate metabolism were enriched in developmentally  
115 regulated genes of all six species (Fig. 1/b, Supplementary Table 6), suggesting that cell wall  
116 remodeling is a common upregulated function in fruiting bodies. Other commonly enriched  
117 terms cover functions such as DNA replication, transmembrane sugar transport, ribosome,  
118 membrane and lipid biosynthesis, while many other were specific to single species  
119 (Supplementary Fig. 3).

120 To obtain a higher resolution of developmental events, we arranged developmentally  
121 regulated genes into co-expression modules using the Short Time Series Expression Miner  
122 (STEM)<sup>18</sup>. Developmentally regulated genes grouped into 28-40 modules, except  
123 *Phanerochaete* which had eleven. The largest modules in all species contained genes  
124 expressed at fruiting body initiation or in early primordia and genes with tissue-specific  
125 expression peaks, in young fruiting body caps, gills, stipes, mature fruiting bodies and stipes or  
126 caps (Fig 1/c; for further data see Supplementary Fig. 4 and Supplementary Note 1). Many  
127 early-expressed modules show upregulation across multiple stages (hyphal knot, stage 1 and 2  
128 primordia), suggestive of an early expression program overarching multiple primordium stages.

129 Co-expression modules display distinct functional enrichment signatures, as shown on Fig 1/c  
 130 and Supplementary Table 7. For example, DNA replication and mitosis were characteristic for  
 131 early-expressed modules, consistent with an early wave of nuclear and cellular division events  
 132 followed by cell expansion without significant change in cell numbers<sup>5</sup>. Growth by cell expansion  
 133 is a mechanism shared with plants and possibly reflects constraints imposed by independently  
 134 evolved rigid cell walls in these groups.  
 135

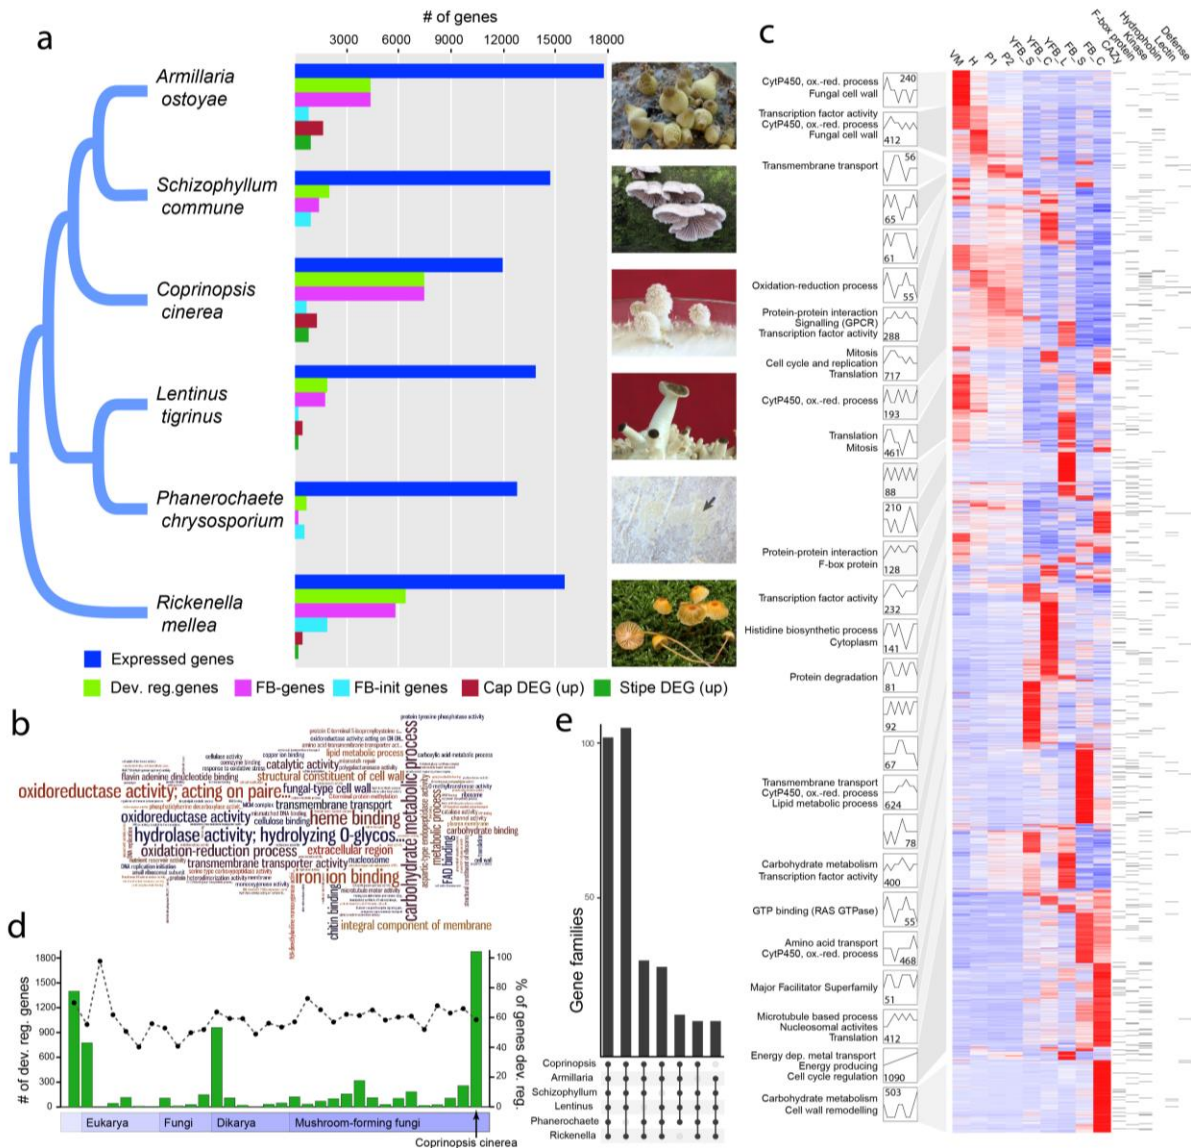

136  
 137 **Fig. 1.** Overview of the developmental transcriptomes, **a**, the distribution of developmentally  
 138 regulated and cap and stipe differentially expressed (DEG) genes in six mushroom-forming  
 139 species. Fruiting bodies are shown on the right (*Phanerochaete*: K. Krizsán, *Rickenella*: Bálint  
 140 Dima, others: L.G. Nagy). Two groups of developmentally regulated genes were defined: those  
 141 that show >4 fold change and a FPKM>4 between any two stages of fruiting body development  
 142 (referred to as 'FB genes') and that show >4 fold increase in expression from vegetative  
 143 mycelium to the first primordium stage (referred to as 'FB-init genes'). These definitions exclude

144 genes that show highest expression in vegetative mycelium and little or no dynamics later on. **b**,  
145 wordcloud of Gene Ontology terms enriched in the developmentally regulated genes in the six  
146 species. Word size corresponds to the number of species in which a term was significantly  
147 enriched ( $P < 0.05$ , Fisher exact test). **c**, Analysis of co-expression modules in *Coprinopsis*  
148 *cinerea*. Heatmap of 7475 developmentally expressed genes arranged based on module  
149 assignment, with simplified expression profiles and the GO enrichment terms given for each  
150 module (see also Supplementary Table 7). We graphically depict only 27 modules with >50  
151 genes (refer to Supplementary Fig. 4 for the complete list and data for other species). The  
152 distribution of key developmental genes is given on the right side of the heatmap. **d**,  
153 Phylostratigraphic profile of developmentally regulated genes of *Coprinopsis cinerea*. Genes are  
154 divided into age categories from genes shared by all cellular life (left) to species-specific genes  
155 (right). The percentage of developmentally regulated genes compared to all genes in a category  
156 is shown by a dashed line. Data for other species is presented in Supplementary Fig. 5. **e**,  
157 UpSetR representation of gene families developmentally regulated in at least 5 species. See  
158 also Supplementary Fig. 6.

## 159 Most developmental gene families are older than fruiting body formation

160 We investigated the evolutionary age distribution of developmentally regulated genes using  
161 phylostratigraphy<sup>19</sup>, based on a dataset of 4,483 archaeal, bacterial and eukaryotic genomes<sup>20</sup>  
162 supplemented with 416 fungi (of which 113 were Agaricomycetes). We assigned genes to  
163 phylogenetic ages, 'phylostrata', by identifying for each gene the most phylogenetically distant  
164 species in which a homolog could be detected. The phylostratigraphic profiles of all species  
165 show three peaks, corresponding to two major periods of fungal gene origin: the first containing  
166 genes shared by all living species, the second by the Dikarya (Ascomycota + Basidiomycota)  
167 and a third containing species-specific genes. Many developmentally regulated genes have  
168 homologs in simple multicellular and unicellular eukaryotes and prokaryotes: the origin of 49.3 -  
169 63.3% predate the origin of mushroom-forming fungi (Fig. 1/d, Supplementary Fig. 5), indicating  
170 that co-option of conserved genes contributed significantly to the evolution of fruiting bodies.  
171 Nevertheless, Agaricomycetes-specific phylostrata showed a characteristic enrichment for F-  
172 box genes, transcription factors and protein kinases, indicating an increased rate of origin for  
173 these in mushroom-forming fungi (Supplementary Table 8).

## 174 Splicing patterns associate with development

175 We reconstructed transcript isoforms across developmental stages and tissue types in the six  
176 species using region restricted probabilistic modeling, a strategy developed for gene-dense  
177 fungal genomes<sup>21</sup>. We found evidence of alternative splicing for 36-46% of the expressed genes  
178 (Supplementary Table 9), which is significantly higher than what was reported for fungi outside  
179 the Agaricomycetes<sup>22,23</sup> (1-8%). This transcript diversity was generated by 6,414 - 13,780  
180 splicing events in the six species. Of the four main types of events, intron retention (44.3-60.5%)  
181 was the most abundant in all species, followed by alternative 3' splice site (22.9-30.1%),  
182 alternative 5' SS (15.6-24.1%) and exon skipping (0.8-2.9%) (Fig. 2/a), consistent with  
183 observations made on other fungi<sup>22-24</sup>. No substantial difference in the proportion of spliced  
184 genes and of splicing events was observed across developmental stages, tissue types or

185 species. Nevertheless, we found that several genes with nearly constant overall expression  
 186 level had developmentally regulated transcript isoforms (Fig 2/b-c). The six species had 159-  
 187 1,278 such genes, the highest number in *Rickenella* (1,278) and the lowest in *Phanerochaete*  
 188 (159) (Fig 2/d, Supplementary Table 9). Based on their expression dynamics, these transcripts  
 189 potentially also contribute to development, expanding the space of developmentally regulated  
 190 genes through alternative splicing.  
 191

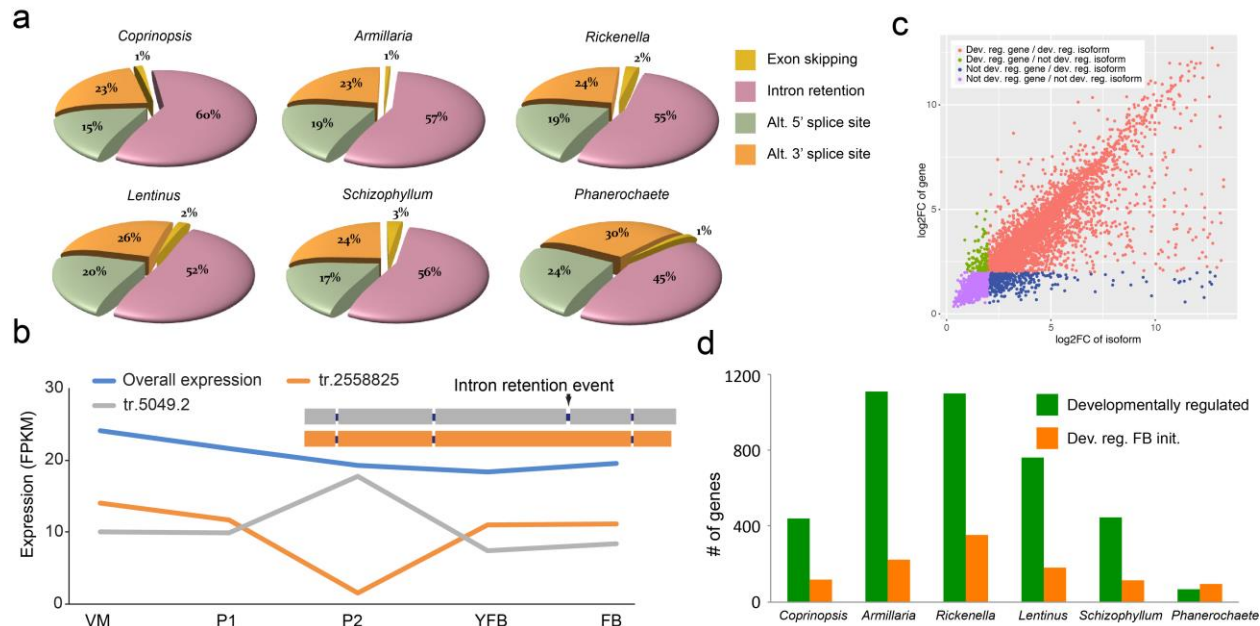

192  
 193 **Fig. 2.** Splicing patterns through fruiting body development. **a.** distribution of four main  
 194 alternative splicing events across species (see also Supplementary Table 9). **b.** Genes with little  
 195 dynamics can contain developmentally regulated transcripts, Schco3\_2558825 is shown here  
 196 as an example **c.** Scatterplot of gene versus transcript expression dynamics in *Coprinopsis*  
 197 *cinerea*, highlighting developmentally regulated transcripts (red). Plotted are fold change values  
 198 between the minimum and maximum expression across all developmental stages for genes (y  
 199 axis) and alternative transcript (x axis). Developmentally regulated transcripts (i.e. those that  
 200 show FC>4 across any two developmental stages and FPKM>4) of non-developmentally  
 201 regulated genes (FC<4) are highlighted in red. **d.** bar plot of developmentally regulated  
 202 transcripts that were detected within not developmentally regulated genes.

## 203 Conserved transcriptomic signatures of mushroom development

204 Our transcriptome data are particularly suited to detecting shared patterns of gene expression  
 205 across species. We analyzed common functional signals in the six species by estimating the  
 206 percent of developmentally regulated genes shared by all or subsets of the species based on  
 207 Markov clustering<sup>25</sup> of protein sequences. We found 100 clusters containing developmentally  
 208 regulated genes from all six species, and 196 in five species (Fig. 1/e, Supplementary Table  
 209 10). These are enriched for GO terms related to oxidation-reduction processes, oxidoreductase  
 210 activity, carbohydrate metabolism, among others, corresponding to a suite of carbohydrate  
 211 active enzymes. Of the 100 families shared by 6 species, fifteen can be linked to the fungal cell

212 wall (FCW), while the remaining families cover diverse cellular functions such as  
213 transmembrane transport (6 families), cytochrome p450s (5 families), targeted protein  
214 degradation (5 families), or peptidases (3 families). One hundred and four gene families are  
215 shared by five species excluding *Phanerochaete* (Fig 1/e), which comes as no surprise, as this  
216 species produces the simple crust-like, fruiting bodies. Besides these highly conserved families,  
217 an additional 73 functional groups of genes are developmentally regulated in six or five species,  
218 but didn't group into gene families due to their higher rate of evolution. These include most  
219 transcription factors, kinases, aquaporins, certain peptidase families and enzymes of primary  
220 carbohydrate metabolism (trehalose and mannitol, Supplementary Figure 8) among others  
221 (Supplementary Table 10).

222 Shared developmentally regulated gene families included a conserved suite of CAZymes  
223 active on the main chitin and  $\beta$ -1,3- and  $\beta$ -1,6- glucan polymers as well as minor components of  
224 the FCW. These included various glycoside hydrolases (GH), hydrophobins, expansin-like  
225 proteins and cerato-platanins, among others. A large suite of  $\beta$ -glucanases, chitinases,  
226 laccases, endo- $\beta$ -1,4-mannanases,  $\alpha$ -1,3-mannosidases were developmentally regulated, many  
227 of which are also expanded in Agaricomycetes (Table 1, Supplementary Fig 7). The expression  
228 of glucan-, chitin- and mannose-active enzymes is consistent with active FCW remodeling  
229 during fruiting body formation and recent reports of similar genes upregulated in the fruiting  
230 bodies of *Lentinula*<sup>12,13,26</sup>, *Flammulina*<sup>27</sup> and *Coprinopsis*<sup>28</sup>. Kre9/Knh1 homologs are  
231 developmentally regulated in all species and are overrepresented in mushroom-forming fungi ( $P$   
232 =  $1.45 \times 10^{-5}$ , FET). This family is involved in  $\beta$ -glucan assembly in *Saccharomyces* and has  
233 putative signaling roles through an interaction with MAP kinases<sup>29</sup>. Although generally linked to  
234 cellulose degradation<sup>30,31</sup>, expansins, lytic polysaccharide monoxygenases and cellobiose  
235 dehydrogenases have recently been shown to target chitin polymers<sup>32,33</sup> or are expressed in  
236 fruiting bodies of *Pycnoporus*<sup>34</sup> and *Flammulina*<sup>35</sup>, suggesting a role in fruiting body  
237 development. In addition, developmental expression of two alginate lyase-like families (Table 1)  
238 were shared by 6 species and that of a  $\beta$ -glucuronidase (GH79\_1) was shared by 4 species  
239 (*Armillaria*, *Coprinopsis*, *Rickenella* and *Lentinus*). While the targets of these families in fruiting  
240 bodies are currently unknown, their conserved expression pattern suggests roles in  
241 polysaccharide metabolism during development<sup>36</sup>. Comparison across 201 genomes revealed  
242 that 24 of these families have undergone expansions in the Agaricomycetes (Table 1,  
243 Supplementary Table 3). In summary, CAZymes might be responsible for producing fruiting  
244 body-specific FCW architectures, confer adhesive properties to neighboring hyphae or plasticity  
245 for growth by cell expansion. We, therefore, suggest that FCW remodeling comprises one of the  
246 foundations of the transition to complex multicellularity during the life cycle of fungi.

247 A significant fraction of conserved developmentally regulated genes carry extracellular  
248 secretion signals and were predicted to be glycosylphosphatidylinositol (GPI) anchored (Fig 3/a,  
249 Supplementary Fig. 9). These include diverse FCW-active proteins, such as laccases (AA1),  
250 glucanases (GH5, GH16, Kre9/Knh1 family), chitooligosaccharide deacetylases, but also  
251 lectins, A1 aspartic peptidases and sedolisins, among others (Supplementary Table 11). GPI-  
252 anchored proteins often mediate adhesion in filamentous and pathogenic fungi<sup>37</sup>, but it is not  
253 known whether similar mechanisms are at play in fruiting bodies<sup>7</sup>. Laccases and glucanases  
254 could facilitate adhesion by oxidative crosslinking or other covalent modifications of neighboring  
255 hyphal surfaces, although more data is needed on the biochemistry involved. Nevertheless, it

256 seems safe to conclude that FCW-active proteins may bind neighboring hyphae through  
257 covalent FCW modifications in fruiting bodies, which would represent a unique adhesion  
258 mechanism among complex multicellular organisms. Homologs of cadherins (adhesive proteins  
259 of animals) are enriched in Agaricomycetes compared to other fungi ( $P = 1.1 \times 10^{-4}$ , FET) and  
260 were developmentally regulated in all species. Although fewer in numbers than in animals, their  
261 convergent expansion in complex multicellular fungi and metazoans could indicate recurrent co-  
262 option for developmental functions.

263 Fruiting body secretomes contained a rich suite of genes encoding small secreted  
264 proteins (SSPs, <300 amino acids, with extracellular secretion signal). Of the 190-477 SSPs  
265 predicted in the genomes of the six species, 20-61% are developmentally regulated, with ~20%  
266 being conserved across the six species (Fig. 3/b Supplementary Fig. 10). Conserved and  
267 annotated genes comprise various FCW-related families, such as hydrophobins, cerato-  
268 platanins, cupredoxins, lectins, Kre9/Knh1, GH12 and LysM domain proteins, among others  
269 (Fig. 3/c, Supplementary Fig. 11). Hydrophobins and cerato-platanins are SSPs that self-  
270 assemble into a rodlet layer on the cell surface, confer hydrophobic surfaces to hyphae that  
271 hinder soaking of fruiting bodies with water. They are hypothesized to mediate adhesion, the  
272 aeration of fruiting bodies<sup>8,38</sup>, or pathogenicity<sup>39</sup>. As reported previously<sup>8</sup>, most hydrophobin  
273 genes are developmentally regulated (Fig. 3/d) and the family is overrepresented in the  
274 genomes of mushroom-forming fungi ( $P < 10^{-300}$ , FET). Cerato-platanins are also expanded ( $P =$   
275  $1.56 \times 10^{-50}$ , FET) and developmentally regulated (except in *Phanerochaete*). In addition to  
276 conserved genes, >40% of developmentally regulated SSPs had no functional annotations  
277 and/or were species-specific orphans (Fig. 3/c). This proportion is similar to that observed in  
278 ectomycorrhiza-induced SSPs<sup>1,40</sup> and suggests that species-specific secreted proteins have a  
279 role also in fruiting body development. Although their function in fruiting bodies is not known,  
280 their role in signaling across partners in ectomycorrhizal<sup>40</sup> and pathogenic interactions<sup>41</sup>, or  
281 within species<sup>42,43</sup>, raises the possibility that some of the detected SSPs might act as fruiting  
282 body effectors. This could also explain the rich SSP repertoires of saprotrophic  
283 Agaricomycetes<sup>44</sup>.



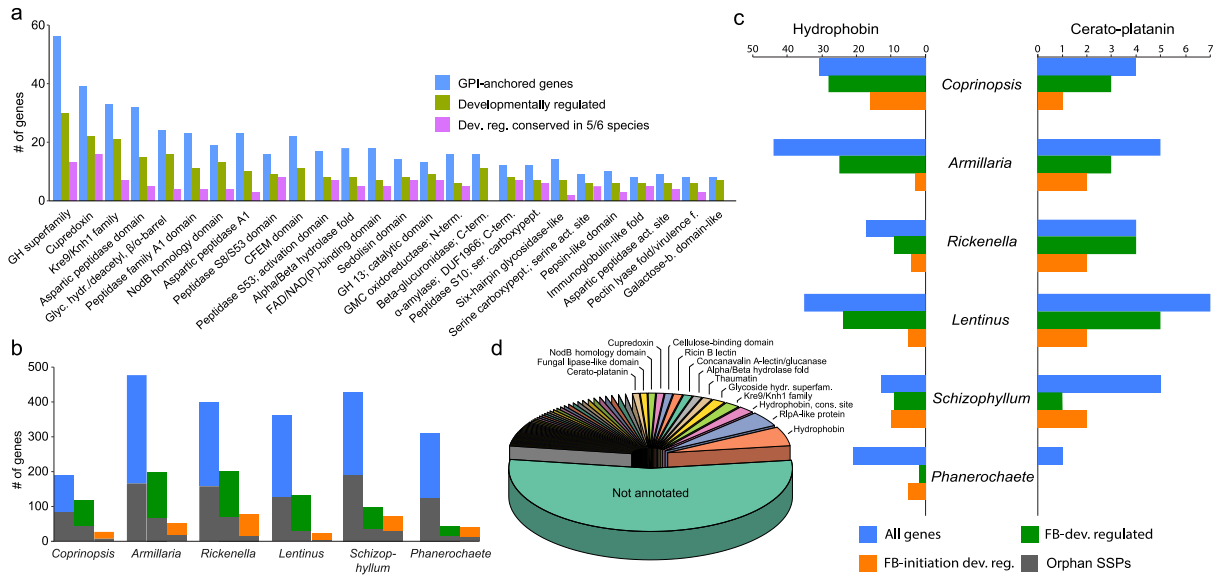

284

285 **Fig. 3.** Diverse secreted proteins are developmentally regulated in fruiting bodies. **a.** the  
 286 distribution of GPI-anchored secreted protein repertoire, its developmentally regulated and  
 287 conserved developmentally regulated subsets. **b.** Numbers of all and developmentally regulated  
 288 small secreted proteins, with orphan genes shaded differently. **c.** Copy number distribution and  
 289 developmental regulation of hydrophobins and cerato-platanins in the six species. **d.** Functional  
 290 annotation of small secreted proteins in the six species.

291

## 292 Targeted protein degradation shows striking expansion in mushrooms

293 We found a strong signal for developmental expression of components the E3 ubiquitin ligase  
 294 complex. Several genes encoding F-box proteins, RING-type zinc-finger and BTB/POZ domain  
 295 proteins are developmentally regulated in all species, often displaying tissue or developmental  
 296 stage-specific expression peaks (Fig. 4, Supplementary Fig. 12). These gene families are also  
 297 strongly overrepresented in the genomes of mushroom-forming fungi compared to related  
 298 filamentous fungi and yeasts (Fig 4/a). For example, while yeasts and filamentous fungi possess  
 299 ~20 and 60-90 F-box proteins<sup>45</sup>, respectively, mushroom-forming fungi have 67-1,199 copies  
 300 (mean: 274), comparable to the numbers seen in higher plants<sup>46</sup> and resulting predominantly  
 301 from recent tandem duplications (Fig. 4/b, Supplementary Fig. 13). They mostly showed a single  
 302 peak in expression and many of them were upregulated at fruiting body initiation or in caps, gills  
 303 and stipes (Fig 4/c). The numbers of developmentally regulated F-box, RING-type zinc-finger  
 304 and BTB/POZ domain containing genes found in the six species show a good correlation with  
 305 fruiting body complexity but a poor correlation with the number of expressed genes (Fig 4/d),  
 306 suggesting a link between the expansion of these genes and the evolution of complex fruiting  
 307 body morphologies. These genes define the target specificity of E3 ubiquitin ligases<sup>45,47</sup>, which  
 308 enables a tight regulation of selective proteolysis during development<sup>46</sup>. In plants, F-box  
 309 proteins can also act as transcriptional regulators<sup>48</sup>, although this is yet to be proven in fungi. On  
 310 the other hand, ubiquitin conjugating (E2) enzymes are developmentally regulated only in  
 311 *Coprinopsis*, *Armillaria* and *Rickenella*, whereas ubiquitin activating (E1) enzymes, cullins,

312 SKP1, HECT-type ubiquitin ligases are neither developmentally regulated nor significantly  
 313 overrepresented in mushroom-forming fungi (Fig 4/e,  $P > 0.05$ , FET). With the exception of  
 314 *Coprinopsis*, we did not detect specific expression patterns of neddylation and deneddylation  
 315 genes as reported for the Ascomycota<sup>49</sup>. Taken together, we observed a striking expansion and  
 316 distinctive expression patterns of genes that define target-specificity of the E3 ubiquitin ligase  
 317 complex (F-box, RING and BTB/POZ proteins) in Agaricomycetes. This parallels F-box gene  
 318 expansion in plants which, combined with their widespread role in development<sup>46,50</sup>, suggests  
 319 that they likely have key roles in complex multicellular development in mushroom-forming fungi.  
 320

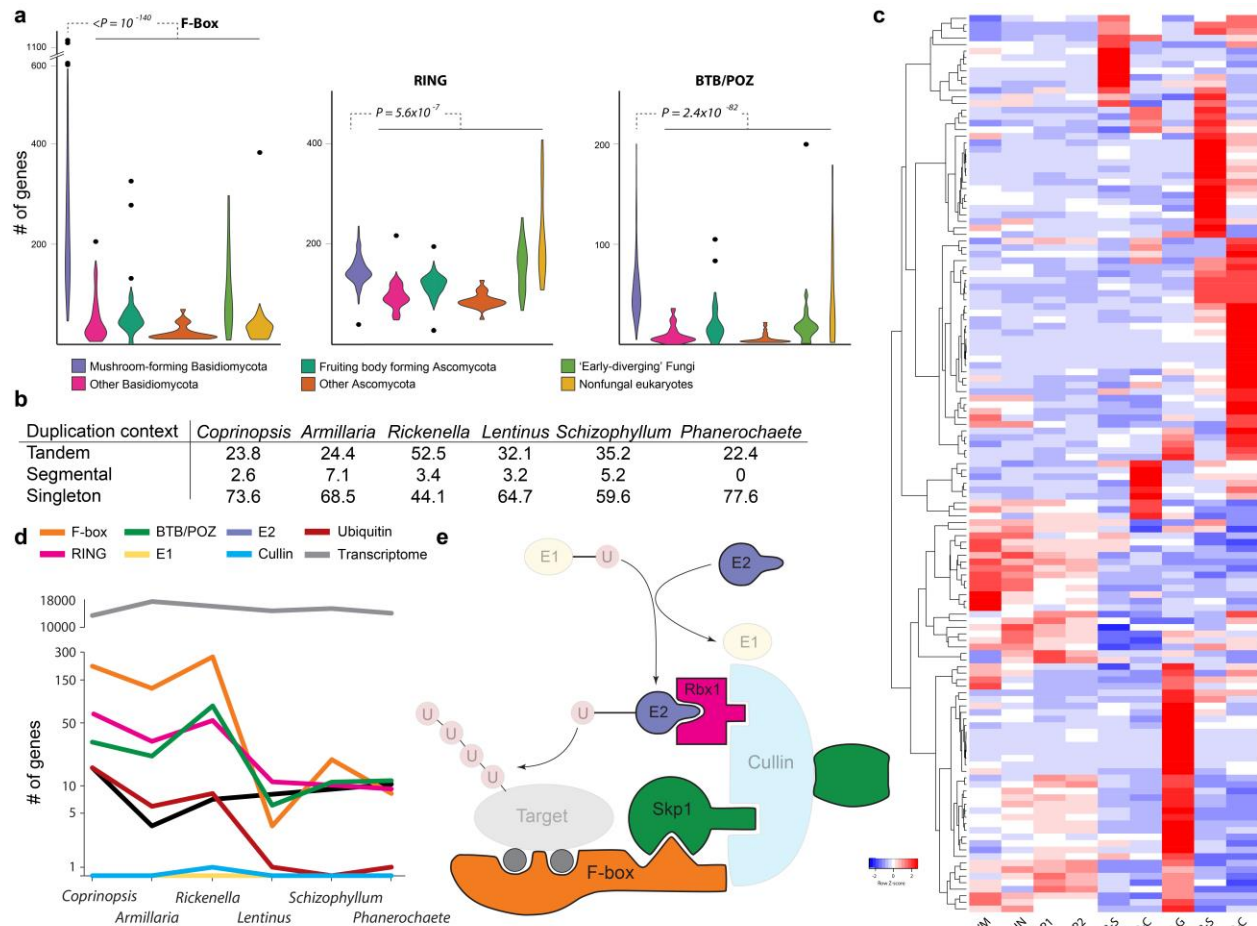

321  
 322 Fig. 4. **a**, Copy number distribution of F-box, RING-type zinc finger and BTB/POZ domain  
 323 proteins showing their enrichment in mushroom-forming fungi compared to other fungal groups.  
 324 **b**, The context of gene duplications of F-box proteins in the genomes of six analyzed species. **c**,  
 325 heatmap of developmentally regulated F-box proteins in *Coprinopsis cinerea*. Genes were  
 326 hierarchically clustered based on gene expression similarity using average linkage clustering.  
 327 Abbreviations: VM - vegetative mycelium, HN - hyphal knot, P1 - stage 1 primordium, P2 - stage  
 328 2 primordium, YFB - young fruiting body, FB - mature fruiting body, '-C' - cap, '-S' - stipe, '-G' -  
 329 gills. **d**, The correlation between morphological complexity of fruiting bodies and the number of  
 330 developmentally regulated elements of the E3 ligase complex. **e**, Outline of the E3 ubiquitin  
 331 ligase complex highlighting members expanded and developmentally regulated (solid) in

332 mushroom-forming fungi. Transparent members are not expanded nor developmentally  
333 regulated.

### 334 Key multicellularity-related genes are developmentally regulated in fruiting 335 bodies

336 Complex multicellularity in fungi is implemented by the reprogramming of hyphal branching  
337 patterns, followed by their adhesion and differentiation<sup>7</sup>. This assumes mechanisms for cell-to-  
338 cell communication, adhesion, differentiation and defense. We examined the expression  
339 dynamics of gene families related to these traits, including transcription factors (TFs), protein  
340 kinases, adhesion and defense-related genes. Like other complex multicellular lineages,  
341 mushroom-forming fungi make extensive use of transcription factors (TFs) in development. To  
342 identify development-related TFs, we manually curated TF candidate genes to exclude ones  
343 that nonspecifically bind DNA. The resulting TFomes contain 278-408 genes, of which 4.5-64%  
344 were developmentally regulated (Supplementary Fig. 14). These were dominated by C2H2 and  
345 Zn(2)C6 fungal type, fungal trans and homeodomain-like TFs (Fig 5/a). Although transcription  
346 factor families were usually not conserved, we found 5 TF families that contained  
347 developmentally regulated genes from 5 or 6 species (Supplementary Table 10). These  
348 included C2H2-type zinc fingers (including *c2h2* of *Schizophyllum*<sup>14,51</sup>), Zn(2)-C6 fungal-type  
349 and homeobox TFs (containing *hom1* of *Schizophyllum*<sup>14,51</sup>). Two clusters of C2H2 and  
350 homeobox TFs showed expression peaks in stipes of *Coprinopsis*, *Lentinus*, *Armillaria* and  
351 *Rickenella*, confirming previous reports of *Hom1* expression in *Coprinopsis*<sup>52</sup> and  
352 *Schizophyllum*<sup>51,53</sup>. Members of the white collar complex were developmentally regulated in all  
353 species except *Phanerochaete*, mostly showing a significant increase in expression at initiation.  
354 However, these genes did not group into one family in the clustering, which was a common  
355 pattern for TF families, perhaps caused by their high rate of sequence evolution.

356 Communication among cells by various signaling pathways is paramount to the increase  
357 of distinct cell types in evolution. In accordance with the higher complexity of mushroom-forming  
358 fungi, their kinomes are significantly larger than that of other fungi ( $P = 1.1 \times 10^{-184}$ , FET, Fig 5/b),  
359 due to expansions of the eukaryotic protein kinase superfamily. We classified protein kinases  
360 into nine groups<sup>54</sup> using published kinome classifications for *Coprinopsis*<sup>3</sup>. The six mushroom  
361 kinomes (Supplementary Table 12) have a similar composition, with PKL, CMGC and CAMK  
362 families being most diverse and RGC and tyrosine kinases missing. The Agaricomycetes-  
363 specific FunK1 family is expanded significantly, as reported earlier<sup>3</sup>. Tyrosine kinase-like  
364 kinases also show a strong expansion in Agaricomycetes ( $P < 10^{-300}$ ), consistent with  
365 observations in *Laccaria bicolor*<sup>55</sup> and other species<sup>56</sup>. Histidine kinases are underrepresented  
366 ( $P = 8.95 \times 10^{-36}$ ) relative to other fungal groups.

367 A kinase co-expression network revealed tissue specificity as the main driver of network  
368 topology (Fig 5/c-d), with most kinases showing an expression peak late in development.  
369 Kinases with early expression peaks are mostly highly expressed through multiple stages,  
370 resembling early expressed modules of *Coprinopsis* (Fig. 1/c, Supplementary Fig. 15). Many  
371 CAMK family members showed expression peaks in cap and gill tissues. However, overlaying  
372 the network with classification shows no general enrichment of any family in developmental  
373 stages or tissues (Fig 5/d-e), indicating diverse co-option events for development at the highest

374 level of kinase classification. The FunK1 family has been linked to multicellular development,  
375 based on an upregulation in fruiting bodies<sup>3</sup>. In our species FunK1 comprises 4-33% of the  
376 kinome and 0.2-35% of the developmentally regulated kinases, although this Fig. resembles  
377 that of other kinase families. Members of the highly expanded tyrosine kinase like (TKL) family  
378 (Fig 5/e) are developmentally regulated in *Coprinopsis*, *Armillaria* and *Rickenella*, but not in  
379 species with simpler morphologies. The expansion and developmental expression of the TKL  
380 family in mushroom-forming fungi is a remarkable case of convergence with complex  
381 multicellular plants<sup>57,58</sup> and animals<sup>58</sup> and may be related to parallel increases in organismal  
382 complexity. Yet, while most plant TKL genes have receptor-like architectures<sup>59</sup>, we found no  
383 evidence of extracellular domains or secretion signals in TKL genes of mushroom-forming fungi,  
384 suggesting they orchestrate signal transduction via soluble kinases or other mechanisms  
385 different from those of multicellular plants and animals.

386 Fungal immune systems comprise innate chemical defense mechanisms against  
387 metazoan predators and bacterial and fungal infections<sup>60</sup>. We catalogued eleven families of  
388 defense effector proteins and their expression to assess the conservation of the defensive  
389 arsenal of Agaricomycetes. Genomes of mushroom-forming fungi harbor highly species-specific  
390 combinations of defense-related genes encoding pore-forming toxins, cerato-platanins, lectins  
391 and copsins, among others, with most of them being developmentally expressed and  
392 upregulated at fruiting body initiation (Supplementary Fig 16). Of the eleven families only three  
393 were conserved, and only one (thaumatins) was developmentally regulated in all six species,  
394 which can display either endoglucanase or antimicrobial activity, depending on the structure of  
395 the mature protein. *In silico* structure prediction identified an acidic cleft in fruiting body  
396 expressed thaumatins (Supplementary Fig 16), consistent with an antimicrobial activity. Several  
397 defense-related lectins have been reported from fruiting bodies<sup>61</sup>, although lectins have been  
398 implicated in cell adhesion and signaling too. Agaricomycete genomes encode at least 17 lectin  
399 and 2 lectin-like families, of which seven are significantly overrepresented ( $P < 0.05$ , FET,  
400 Supplementary Table 3). Developmentally regulated lectins belong to nine families, with 4-7  
401 family per species, but only ricin B lectins were developmentally regulated in all six species  
402 (Supplementary Fig 17). Other lectin families show a patchy phylogenetic distribution, which is  
403 also reflected in their expression patterns in fruiting bodies. Several lectins are induced at  
404 fruiting body initiation, including all previously reported nematotoxic *Coprinopsis* lectins (CCL1-  
405 2, CGL1-3 and CGL3). Taken together, the defense effector and lectin-encoding arsenal of  
406 mushroom-forming fungi shows a patchy phylogenetic distribution, consistent with high gene  
407 turnover rates or gains via horizontal gene transfer<sup>60</sup>. Accordingly, expressed defense gene sets  
408 are highly species-specific, with most of the encoded genes upregulated in fruiting bodies,  
409 suggesting that chemical defense is a key fruiting body function.

410  
411

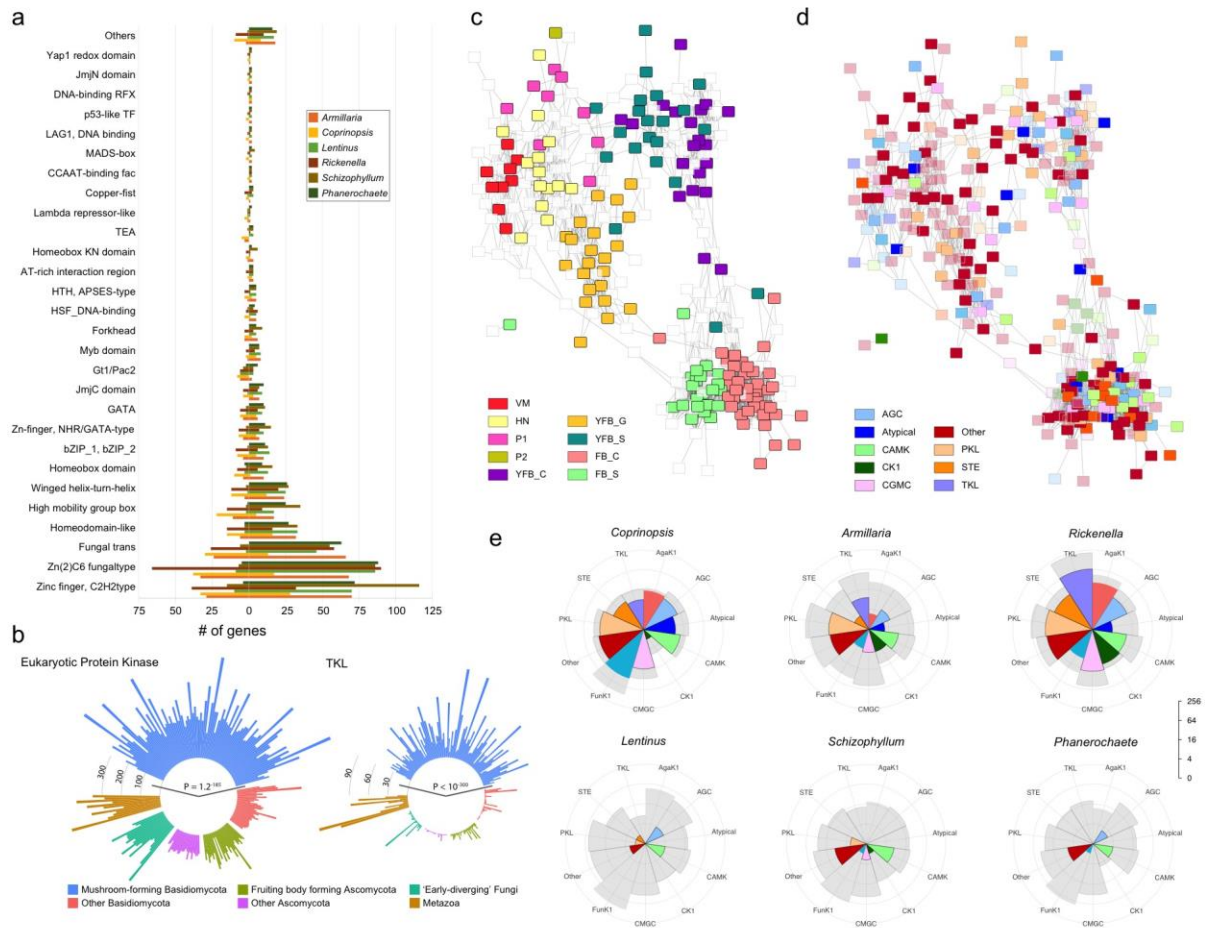

412  
413 **Fig. 5.** Expression and copy number distribution of transcription factor and kinase genes. **a.**  
414 transcription factor family distribution and the proportions of developmentally regulated (left)  
415 versus not regulated (right) genes across six species. **b.** Circular bar diagram of eukaryotic  
416 protein kinase (left) and tyrosine kinase-like (right) repertoires of mushroom-forming fungi  
417 versus in other fungal groups and non-fungal eukaryotes. P values of overrepresentation in  
418 mushroom-forming fungi are given for both plots. **c** and **d.** Co-expression network of 306  
419 expressed kinases of *Coprinopsis cinerea* overlaid with expression peak (**c**) and kinase  
420 classification (**d**). Pairwise correlation coefficients of expression profile similarity were calculated  
421 for each pair of kinase genes and networks were visualized with a correlation coefficient cutoff  
422 of 0.825. **e.** Kinome (grey fill) and developmentally regulated kinome (solid fill) repertoires of the  
423 six species split by kinase classification. The families Funk1 and Agak1 of the 'Other' group are  
424 shown separately. Axes are transformed to log<sub>2</sub> scale.

## 425 Discussion

426 We charted the transcriptomic landscape of multicellular development in 6 phylogenetically  
427 diverse mushroom-forming species and performed comparative analyses of >200 genomes. We  
428 pinpointed nearly 300 conserved gene families, and another 73 gene groups with  
429 developmentally dynamic expression in ≥5 species, as well as 631 domains significantly  
430 overrepresented in mushroom-forming fungi. These are enriched in cell wall modifying

431 enzymes, various secreted proteins (including GPI-anchored and small secreted proteins),  
432 components of the ubiquitin ligase complex, kinases or transcription factors. Lectins and  
433 defense effectors, on the other hand, showed species-specific repertoires, indicating a higher  
434 rate of evolutionary turnover. These data provide a framework for elucidating the core genetic  
435 program of fruiting body formation and will serve as guideposts for a systems approach to  
436 understanding the genetic bases of mushroom development and multicellularity.

437 Complex multicellularity evolved in five lineages, of which plants, animals and fungi are  
438 the most diverse<sup>7,58</sup>. At the broadest level of comparison, these lineages evolved similar  
439 solutions to cell adhesion, communication, long-range transport and differentiation<sup>58,62,63</sup>. As in  
440 animals and plants, protein kinases, putative adhesive proteins, defense effectors, and certain  
441 transcription factors have expanded repertoires in mushroom-forming fungi and show  
442 developmentally dynamic expression patterns. Examples for convergent expansions in  
443 mushroom-forming fungi, in plants and/or animals include TKL family kinases, F-box proteins  
444 and cadherins, indicating that ancient eukaryotic gene families with apt biochemical properties  
445 have been repeatedly co-opted for complex multicellularity during evolution. F-box proteins  
446 showed the largest expansion in Agaricomycetes across all families and was the largest  
447 developmentally regulated family, along with RING-type and BTB domain proteins. Among  
448 independently evolved fruiting body forming fungi<sup>7,49,64</sup>, Agaricomycetes share some similarity  
449 with the Pezizomycotina (Ascomycota), many of which also produce macroscopic fruiting  
450 bodies. For example, laccases, lectins, several transcription factors and signal transduction  
451 systems have also been implicated in fruiting body formation in the Pezizomycotina, although at  
452 the moment it is unclear how frequently convergent expansions and co-option events can be  
453 observed in independently evolved lineages of complex multicellular fungi<sup>7</sup>.

454 Mushroom-forming fungi also show several unique solutions for multicellularity, as  
455 expected based on their independent evolutionary origin. These are, in part, explained by the  
456 very nature of fungi: complex multicellularity comprises the reproductive phase of the life cycle  
457 (except in sclerotia, rhizomorphs) and so mechanisms have evolved for sensing when fruiting  
458 body formation is optimal (e.g. nutrient availability, light). Mushroom development can be  
459 partitioned into an early phase of cell proliferation and differentiation and a growth phase of  
460 rapid cell expansion, a division evident on gene co-expression profiles as well. Broadly  
461 speaking, this is similar to the development of fleshy plant fruits, although mechanisms are likely  
462 to be convergent, like many other aspects of mushroom development.

463 This work has provided a glimpse into the core genetic toolkit of complex multicellularity  
464 in mushroom-forming fungi. Our comparative transcriptomic genomic analyses revealed gene  
465 families, most of which reported as novel, with conserved developmental expression in fruiting  
466 bodies, with scope to increase the resolution both phylogenetically and among cell types (e.g.  
467 by single-cell RNA-Seq). Such data should help defining the conserved genetic programs  
468 underlying multicellularity in mushroom-forming fungi, and uncovering the evolutionary origins of  
469 a major complex multicellular lineage in the eukaryotes.

470

## 471 Methods

### 472 Strains, fruiting protocols and nucleic acid extraction

473 For fruiting *Coprinopsis cinerea* strain #326 (*A43mut B43mut pab 1-1*) an agar disk (5 mm in  
474 diameter) was placed on the center of YMG/T agar media (4 g yeast extract, 10 g malt extract, 4  
475 g glucose, 10 g agar media with 100 mg tryptophane added after cooling<sup>65</sup>) at 37 °C for five  
476 days in the dark. When the colonies reached the 1-2 mm distance from the edge of Petri dishes  
477 they were placed into 25 °C for one week in a 12 hrs light/12 hrs dark cycle for fruiting. Fruiting  
478 body stages were defined following standard conventions<sup>5</sup>. Exact alignment of developmental  
479 stages across species was impossible, but we made an attempt to define functionally putatively  
480 homogeneous stages to follow the general notation of mushroom developmental stages as  
481 closely as possible in each species. Nevertheless, the array of sample types differed from  
482 species to species, due to the morphological diversity of fruiting bodies or limitations in  
483 dissectability. In *Coprinopsis*, vegetative mycelium, hyphal knot, stage 1 and stage 2 primordia,  
484 young fruiting body cap, gills and stipe, fruiting body cap and stipe were harvested for RNA  
485 extraction. The hyphal knot stage was defined as an up to 0.5 mm diameter condensed hyphal  
486 aggregate. Stage 1 primordia were defined as up to 2 mm tall shaft like structures, while stage 2  
487 primordia up to 4 mm tall fruiting body initials with visible differentiation of cap and stipe initials.  
488 Young fruiting bodies were up to 15 mm tall with a slightly elongated stipe and immature  
489 basidia. Fruiting bodies had fully extended stipes and caps, being in an early autolytic phase.

490 Before fruiting, *Schizophyllum commune* the H4-8a and H4-8b monokaryons<sup>4</sup> were  
491 grown on MM medium according to Dons et. al.<sup>66</sup>. After dikaryon formation an agar plug (5 mm)  
492 was placed on the center of fresh MM medium at 30 °C for five days in the dark, then it was  
493 placed at 25 °C for 10 days in a 12/12 hrs light/dark cycle (cool white F18w/840), upside down.  
494 Dikaryotic vegetative mycelium, stage 1 and 2 primordia, young fruiting body and fruiting body  
495 stages were harvested for RNA-seq. We defined stage 1 primordia as up to 2 mm fruiting body  
496 initials, stage 2 primordia as 3-4 mm tall initials with an apical pit on the top, the young fruiting  
497 body as a 5-7 mm tall cup-like structure with visible pseudolamellae inside, while fully expanded  
498 ones were considered fruiting body.

499 Vegetative mycelia of *Lentinus tigrinus* RLP-9953-sp were maintained on MEA (20 g  
500 malt extract, 0.5 g yeast extract, 15 g agar for 1L). For fruiting a mycelial plug was placed (5 mm  
501 diameter) on modified sawdust-rice bran medium<sup>67</sup> (1 part wheat bran and 2 parts aspen  
502 sawdust wetted to 65% moisture for 100 ml in a 250 ml beaker). The culture was incubated for  
503 21 days at 30 °C in the dark, then placed in a moist growth chamber at 25 °C in a 12/12 hour  
504 light/dark cycle. Vegetative mycelia, stage 1 primordia, stage 2 primordia cap and stipe, young  
505 fruiting body cap and stipe and fruiting body cap and stipe tissues were harvested for RNA-Seq.  
506 Stage 1 primordium was defined as a 5-20 mm tall white stalk-structure without any  
507 differentiation of a cap initial, stage 2 primordium was defined as a 15 – 25 mm tall stalk-like  
508 structure with a brown apical pigmentation (cap initial), young fruiting body had and up to 5 mm  
509 wide brown cap initial with just barely visible gills on the bottom, growing on a 30-40 mm tall  
510 stipe, fruiting body was 50-70 mm tall, with fully flattened (but not funnel-shaped) cap.

511 *Phanerochaete chrysosporium* RP-78 was fruited on YMPG media (10 g glucose, 10 g  
512 malt extract, 2 g peptone, 2 g yeast extract, 1 g asparagine, 2 g KH<sub>2</sub>PO<sub>4</sub>, 1 g MgSO<sub>4</sub> x 7 H<sub>2</sub>O,  
513 20 g agar for 1L with 1 mg thiamine added after cooling) covered with cellophane for 7 days at  
514 37 °C in the dark, then placed in a moist growth chamber at 25 °C in an area with dimmed  
515 ambient light conditions, following the recommendations of Jill Gaskell (US Forest Products  
516 Laboratory, Washington, D. C., USA). Vegetative mycelium, young fruiting body and fruiting

517 body stages were harvested for RNA extraction. Young fruiting body stage was defined as  
518 fruiting body initials that forms a compact mat well-delimited from the surrounding vegetative  
519 mycelium, while the fruiting bodies were harvested just after they started releasing spores  
520 (visible on the lids of Petri dishes).

521 *Rickenella mellea* SZMC22713 was cultured on Fries Agar<sup>68</sup> for harvesting vegetative  
522 mycelium for RNA and DNA extraction. DNA for genome sequencing was extracted using the  
523 Blood & Cell Culture DNA Maxi Kit (Qiagen) from 300 mg finely ground mycelium powder  
524 according to the manufacturer's instructions. The internal transcribed spacer region was PCR  
525 amplified and sequenced to verify strain identity. For RNA-Seq, fruiting body stages were  
526 collected in November 2016 from Kistelek, Hungary (approx. coordinates: 46.546309,  
527 19.954507). Stage 1 primordium was defined as an approximately 1 mm tall, shaft-like, pear-  
528 shaped structure, without any visible cap initial, stage 2 primordium was described as a 2-3 mm  
529 tall structure with a small cap initial, young fruiting body was defined by the 5-15 mm tall  
530 structure with a 1-2 mm wide cap, and the fruiting body was characterized by a fully expanded  
531 cap on the top of a 20-32 mm tall stipe.

532 Data for *Armillaria ostoyae* C18/19 were taken from our previous study<sup>16</sup>, with the  
533 following stages defined: vegetative mycelium, stage 1 primordium, stage 2 primordium cap and  
534 stipe, young fruiting body cap and stipe, and fruiting body cap, stipe and gills.

535 For RNA extraction all samples were immediately placed on liquid nitrogen after  
536 harvesting and stored at -80 °C until use. Frozen tissues were weighed and 10-20 mg of *C.*  
537 *cinerea*, *S. commune*, *P. chrysosporium* and *R. mellea* and 50-75 mg of *L. tigrinus* were  
538 transferred to a pre-chilled mortar and ground to a fine powder using liquid nitrogen. We  
539 extracted RNA of *C. cinerea*, *S. commune*, *P. chrysosporium* and *R. mellea* using the Quick-  
540 RNA™ Miniprep (Zymo Research), or the RNeasy Midi Kit (QIAGEN) for *L. tigrinus*. Both of the  
541 kits were used according to the manufacturer's instructions.

542

#### 543 **De novo draft genome for *Rickenella mellea***

544 The genome and transcriptome of *Rickenella mellea* were sequenced using Illumina platform.  
545 The genomes were sequenced as pairs of Illumina standard and Nextera long mate-pair (LMP)  
546 libraries. For the Illumina Regular Fragment library, 100 ng of DNA was sheared to 300 bp using  
547 the Covaris LE220 and size selected using SPRI beads (Beckman Coulter). The fragments  
548 were treated with end-repair, A-tailing, and ligation of Illumina compatible adapters (IDT, Inc)  
549 using the KAPA-Illumina library creation kit (KAPA biosystems).

550 For the Illumina Regular Long-mate Pair library (LMP), 5 ug of DNA was sheared using  
551 the Covaris g-TUBE(TM) and gel size selected for 4 kb. The sheared DNA was treated with end  
552 repair and ligated with biotinylated adapters containing *loxP*. The adapter ligated DNA  
553 fragments were circularized via recombination by a Cre excision reaction (NEB). The  
554 circularized DNA templates were then randomly sheared using the Covaris LE220 (Covaris).  
555 The sheared fragments were treated with end repair and A-tailing using the KAPA-Illumina  
556 library creation kit (KAPA biosystems) followed by immobilization of mate pair fragments on  
557 streptavidin beads (Invitrogen). Illumina compatible adapters (IDT, Inc) were ligated to the mate  
558 pair fragments and 8 cycles of PCR was used to enrich for the final library (KAPA Biosystems).

559 Stranded cDNA libraries were generated using the Illumina Truseq Stranded RNA LT kit.  
560 mRNA was purified from 1 µg of total RNA using magnetic beads containing poly-T oligos.



561 mRNA was fragmented and reversed transcribed using random hexamers and SSII (Invitrogen)  
562 followed by second strand synthesis. The fragmented cDNA was treated with end-pair, A-tailing,  
563 adapter ligation, and 8 cycles of PCR.

564 The prepared libraries were quantified using KAPA Biosystem's next-generation  
565 sequencing library qPCR kit and run on a Roche LightCycler 480 real-time PCR instrument. The  
566 quantified libraries were then multiplexed with other libraries, and the pool of libraries was then  
567 prepared for sequencing on the Illumina HiSeq sequencing platform utilizing a TruSeq paired-  
568 end cluster kit, v4, and Illumina's cBot instrument to generate a clustered flow cell for  
569 sequencing. Sequencing of the flow cell was performed on the Illumina HiSeq2500 sequencer  
570 using HiSeq TruSeq SBS sequencing kits, v4, following a 2x150 indexed run recipe (2x100bp  
571 for LMP).

572 Genomic reads from both libraries were QC filtered for artifact/process contamination  
573 and assembled together with AllPathsLG v. R49403<sup>69</sup>. Illumina reads of stranded RNA-seq data  
574 were used as input for de novo assembly of RNA contigs, assembled into consensus  
575 sequences using Rnnotator (v. 3.4)<sup>70</sup>. Both genomes were annotated using the JGI Annotation  
576 Pipeline and made available via the JGI fungal portal MycoCosm<sup>71</sup>. Genome assemblies and  
577 annotation were also deposited at DDBJ/EMBL/GenBank under the accession XXXXX (TO BE  
578 PROVIDED UPON PUBLICATION).

579

#### 580 **RNA-Seq**

581 Whole transcriptome sequencing was performed using the TrueSeq RNA Library Preparation Kit  
582 v2 (Illumina) according to the manufacturer's instructions. Briefly, RNA quality and quantity  
583 measurements were performed using RNA ScreenTape and Reagents on TapeStation (all from  
584 Agilent) and Qubit (ThermoFisher); only high quality (RIN >8.0) total RNA samples were  
585 processed. Next, RNA was DNaseI (ThermoFisher) treated and the mRNA was purified and  
586 fragmented. First strand cDNA synthesis was performed using SuperScript II (ThermoFisher)  
587 followed by second strand cDNA synthesis, end repair, 3'-end adenylation, adapter ligation and  
588 PCR amplification. All of the purification steps were performed using AmPureXP Beads  
589 (Backman Coulter). Final libraries were quality checked using D1000 ScreenTape and  
590 Reagents on TapeStation (all from Agilent). Concentration of each library was determined using  
591 either the QPCR Quantification Kit for Illumina (Agilent) or the KAPA Library Quantification Kit  
592 for Illumina (KAPA Biosystems). Sequencing was performed on Illumina instruments using the  
593 HiSeq SBS Kit v4 250 cycles kit (Illumina) or the NextSeq 500/550 High Output Kit v2 300  
594 cycles (Illumina) generating >20 million clusters for each sample.

595

#### 596 **Bioinformatic analyses of RNA-Seq data**

597 RNA-Seq analyses were carried out as reported earlier<sup>16</sup>. Paired-end Illumina (HiSeq, NextSeq)  
598 reads were quality trimmed using the CLC Genomics Workbench tool version 9.5.2 (CLC  
599 Bio/Qiagen) removing ambiguous nucleotides as well as any low quality read end parts. Quality  
600 cutoff value (error probability) was set to 0.05, corresponding to a Phred score of 13. Trimmed  
601 reads containing at least 40 bases were mapped using the RNA-Seq Analysis 2.1 package in  
602 CLC requiring at least 80% sequence identity over at least 80% of the read lengths; strand  
603 specificity was omitted. List of reference sequences is provided as Supplementary table 1.  
604 Reads with less than 30 equally scoring mapping positions were mapped to all possible

605 locations while reads with more than 30 potential mapping positions were considered as  
606 uninformative repeat reads and were removed from the analysis.

607 “Total gene read” RNA-Seq count data was imported from CLC into R version 3.0.2.  
608 Genes were filtered based on their expression levels keeping only those features that were  
609 detected by at least five mapped reads in at least 25% of the samples included in the study.  
610 Subsequently, “calcNormFactors” from “edgeR” version 3.4.2<sup>72</sup> was used to perform data  
611 scaling based on the “trimmed mean of M-values” (TMM) method<sup>73</sup>. Log transformation was  
612 carried out by the “voom” function of the “limma” package version 3.18.13<sup>74</sup>. Linear modeling,  
613 empirical Bayes moderation as well as the calculation of differentially expressed genes were  
614 carried out using “limma”. Genes showing at least four-fold gene expression change with an  
615 FDR value below 0.05 were considered as significant. Multi-dimensional scaling (“plotMDS”  
616 function in edgeR) was applied to visually summarize gene expression profiles revealing  
617 similarities between samples. In addition, unsupervised cluster analysis with Euclidean distance  
618 calculation and complete-linkage clustering was carried out on the normalized data using  
619 “heatmap.2” function from R package “gplots”.

620

### 621 **Identification of developmentally regulated genes**

622 We considered genes with a Fragments Per Kilobase Million (FPKM) value >1 to have a non-  
623 zero expression. Because differentially expressed genes can only be defined in pairwise  
624 comparisons of samples and thus didn’t suit our developmental series data, we opted to use the  
625 concept of developmentally regulated gene. These were defined as any gene showing an over  
626 four-fold change in expression between any two developmental stages or tissue types and a  
627 maximum expression level of FPKM > 4 in at least one developmental stage. Comparisons  
628 between tissue types were only performed within the respective developmental stage. We  
629 distinguished developmentally regulated genes that showed over four-fold upregulation at  
630 fruiting body initiation (‘FB-init’ genes) and those that show over four-fold expression dynamics  
631 (up- or downregulation) across the range of fruiting body stages (‘FB genes’, i.e. vegetative  
632 mycelium excluded). Note that this strategy excludes genes showing highest expression in  
633 vegetative mycelium and no dynamics later on, to remove genes with a significant  
634 downregulation at the onset of fruiting body development (e.g. those involved in nutrient  
635 acquisition by the mycelium).

636

### 637 **Comparative genomic approaches**

638 To obtain characteristic Interpro domain signatures of Agaricomycetes, we assembled a dataset  
639 comprising genomes of 201 species; ranging from simple unicellular yeasts to filamentous and  
640 complex multicellular fungi. InterProscan version 5.24-63.0 was used to perform IPR searches.  
641 The 201 species were categorized into two major groups; mushroom-forming fungi (113  
642 species) and all other fungi (88 species, 1 Cryptomycota, 2 Microsporidia, 2  
643 Neocallimastigomycota, 3 Chytridiomycota, 2 Blastocladiomycota, 14 Zygomycota, 1  
644 Glomeromycota, 38 Ascomycota, 20 non-fruiting body forming Basidiomycota). The enrichment  
645 of IPR domains was tested using Fisher's exact test and corrected for multiple testing by the  
646 Benjamini-Hochberg method in R (R core team 2016). P<0.01 was considered significant.  
647 Significantly overrepresented IPR domains were characterized by Gene Ontology Terms using  
648 IPR2GO.

649 An all-versus-all protein BLAST was performed for the six species (*A. ostoyae*, *C.*  
650 *cinerea*, *S. commune*, *L. tigrinus*, *P. chrysosporium*, *R. mellea*) and for the 201-species dataset  
651 using mpiBLAST (v.1.6.0) with default parameters. Clustering was done using Markov Cluster  
652 with an inflation parameter of 2.0<sup>25</sup>.

653

### 654 **Reconstruction of alternative splicing patterns**

655 We reconstructed patterns of alternative splicing using the RNA-Seq data for all six species. To  
656 this end, we used region-restricted probabilistic modelling (RRPM)<sup>21</sup> to discover alternative  
657 transcripts, as described by Gehrman et al.. Briefly, the genome was split at gene boundaries  
658 into fragments, then all RNA-Seq reads were aligned to these fragments with STAR v2.5.3a<sup>75</sup>, in  
659 two rounds. The first round of read alignment was run to produce a novel splice junction  
660 database, which was used to improve mapping in the second round. Using the BAM file from  
661 this alignment, Cufflinks v2.2.1<sup>76</sup> was run in RABT mode to predict novel transcripts. To restore  
662 the context, these sets of transcripts were projected back onto the original annotation. The  
663 resulting annotation file was filtered to remove predicted transcripts with no detectable  
664 expression (FPKM = 0) or did not have reads supporting its splice junctions. We performed read  
665 alignment using STAR again with the same two round method and the new, corrected  
666 annotation file and used the Cufflinks suite to estimate the expression level for each transcript.  
667 We then aligned reads of each RNA-Seq replicate separately to the genome with updated gene  
668 annotation. This resulted in an expression profile for each alternatively spliced transcript, in  
669 every developmental stage. We subsequently identified developmentally regulated transcripts  
670 using the same functions as described above for genes. For splicing event discovery, we used  
671 the ASpli<sup>77</sup> R package where we used the most significant transcript (the most abundant  
672 transcript through the developmental stages) as the reference for event discovery. Custom  
673 scripts were used to extract stage and tissue-type specificity and distribution of spliced genes  
674 and splicing events.

675

### 676 **Phylostratigraphic analysis**

677 To examine the evolutionary origin of developmentally regulated genes in each species, a  
678 phylostratigraphic analysis was performed<sup>19</sup>. First, we assembled a database containing  
679 genomes covering the evolutionary route from the most recent common ancestor of cellular  
680 organisms to the respective species, by complementing the database of Drost et al.<sup>20</sup>. Fungal,  
681 microsporidia and plant genomes were removed from this database and substituted by 416  
682 fungal genomes (all published), including 382 belonging to the Dikarya and 116 to the  
683 Agaricomycetes. In addition, 6 microsporidia, 59 plant and 6 Opisthokonta<sup>78</sup> genomes were  
684 added, resulting in a database of 4,483 genomes. The database was divided into age  
685 categories ('phylostrata') based on the tree available at MycoCosm<sup>71</sup> and the eukaryotic tree  
686 published by Torruella et al.<sup>78</sup>. The oldest phylostratum consisted of bacteria and archaea.  
687 Whole proteomes of *Coprinopsis cinerea*, *Armillaria ostoyae*, *Schizophyllum commune*,  
688 *Lentinus tigrinus*, *Phanerochaete chrysosporium* and *Rickenella mellea* were blasted against  
689 this database using mpiblast 1.6.0<sup>79</sup> with default settings. Blast hits were filtered with an E-value  
690 cut-off of  $1 \times 10^{-6}$  and a query coverage cut-off of 80%. After filtering, the age of each gene was

691 defined as the node of the tree representing the last common ancestor of the species sharing  
692 homologs of the gene, at the specified blast cutoff.

693 To infer what Agaricomycete-specific genes are preferentially developmentally  
694 regulated, we analyzed the enrichment of annotation terms among developmentally regulated  
695 genes specific to Agaricomycetes compared to developmentally regulated genes whose origin  
696 predates the Agaricomycetes. To this end, we divided the phylostratigraphy profiles into two  
697 groups, corresponding to genes that originated before and those that originated after the origin  
698 of mushroom-forming fungi (Phylostratum 18). We tested for significant enrichment of IPR  
699 domains (evaluate  $< 1e-5$ ) in developmentally regulated genes that originated within the  
700 Agaricomycetes, relative to the other group of more ancient developmentally regulated genes  
701 using Fisher's exact test ( $P < 0.05$ ).

702

### 703 **CAZyme annotation**

704 Genes encoding putative carbohydrate-active enzymes were annotated using the CAZy  
705 pipeline. BLAST and Hmmer searches were conducted against sequence libraries and HMM  
706 profiles in the CAZy database<sup>80</sup> (<http://www.cazy.org>). Positive hits were validated manually and  
707 assigned a family and subfamily classification across Glycoside Hydrolase (GH), Carbohydrate  
708 Esterase (CE), Glycoside Transferase (GT), Polysaccharide Lyase (PL), Carbohydrate-Binding  
709 Module (CBM) and Auxiliary redox enzyme (AA) classes of the CAZy system<sup>81</sup>. Activities were  
710 determined by BLAST searches against biochemically characterized subsets of the CAZy  
711 database.

712

### 713 **Coexpression analysis**

714 Developmentally regulated genes in each species were clustered into co-expression modules  
715 based on their expression dynamics by using the clustering method implemented in Short Time-  
716 series Expression Miner (STEM v. 1.3.11)<sup>18,82</sup>. Default parameters were used, except minimum  
717 absolute expression change, which was set to 4. Functional annotations of modules were  
718 obtained by GO enrichment analyses in TopGO (see below). For a higher-level grouping of co-  
719 expression modules, we defined six categories corresponding to early and late expressed  
720 genes, cap, stipe and gill specific genes and a mixed category. Coexpression modules were  
721 placed in one of these categories if more than half of the module's members had the same  
722 tissue- or stage-specific expression peaks. Modules without stage or tissue specificity were  
723 grouped in the mixed category. The early expressed category included coexpression modules  
724 with expression peaks in H, P1 or P2 stages, while late module category consisted of modules  
725 with young fruiting body and fruiting body stage specific expression peaks. We functionally  
726 annotated the modules and higher categories using InterPro Scan v5.24-63.0.

727 To visualize the kinase expression network across various kinase groups and  
728 developmental stages, a co-expression network was visualized using Cytoscape v3.6.1 based  
729 on pairwise Pearson correlation coefficients for kinase expression patterns in *Coprinopsis*  
730 *cinerea*. Pairwise Pearson correlations coefficients for each kinase gene pair were calculated  
731 and a 0.85 cut-off was applied for network construction.

732

### 733 **Functional annotations, GO and Interpro enrichment**

734 Gene Ontology (GO) enrichment analyses were carried out for developmentally regulated  
735 genes. For this, we annotated genes with GO terms based on their InterPro domain contents.  
736 Analyses were performed using Fisher's exact test with threshold  $P < 0.05$  in the R package  
737 topGO. The parameter algorithm weighted01 was chosen. Heatmaps were created using the  
738 heatmap.2 function of the R package 'gplots'. Unsupervised cluster analysis with Pearson's  
739 distance calculation and averaged-linkage clustering was carried out on the FPKM values, and  
740 heatmaps was visualised using z-score normalization on the rows via the heatmap.2 function.

741 Prediction of glycosylphosphatidylinositol anchored proteins (GPI-Ap) for the six species  
742 was performed using the portable version of Pred-GPI<sup>83</sup>. From the proteins with a predicted  
743 GPI-anchor, we excluded ones which had no extracellular signal sequence, as assessed by  
744 SignalP version 4.1<sup>84</sup>. Prediction of Small Secreted Proteins (SSP) for the six species was  
745 performed using a modified version of the bioinformatic pipeline of Pellegrin et al.<sup>44</sup>. Proteins  
746 shorter than 300 amino acids were subjected to signal peptide prediction in SignalP (version  
747 4.1) with the option "eukaryotic". Extracellular localisation of these proteins was checked with  
748 WoLFPSort version 0.2<sup>85</sup> using the option "fungi". Proteins containing transmembrane helix not  
749 overlapping with the signal peptide were also excluded. Prediction of transmembrane helices  
750 was performed with TMHMM (version 2.0)<sup>86</sup>. Finally, proteins containing a KDEL motif (Lys-Asp-  
751 Glu-Leu) in the C-terminal region (prosite accession "PS00014") responsible for retention in the  
752 endoplasmic reticulum (ER) lumen, were identified using PS-SCAN ([http://www.hpa-  
753 bioinfotools.org.uk/cgi-bin/ps\\_scan/ps\\_scanCGI.pl](http://www.hpa-bioinfotools.org.uk/cgi-bin/ps_scan/ps_scanCGI.pl)) and excluded.

754 We identified transcription factors based on the presence of InterPro domains with  
755 sequence-specific DNA-binding activity retrieved from literature data<sup>87,88</sup> and manual curation of  
756 the Interpro-database. Annotated genes were then filtered based on their domain architecture in  
757 order to discard genes encoding DNA-binding proteins with functions other than transcription  
758 regulation (such as DNA-repair, DNA-replication, translation, meiosis).

759 We extracted the putative kinase genes from the 6 species based on their InterPro  
760 domain composition, and manually curated the classical kinases by excluding domains which  
761 correspond to metabolism related kinases and other non-classical protein kinases. The set of  
762 proteins having kinase related domains (Supplementary table 12) were subjected to BLAST  
763 searches (BLAST 2.7.1+, E-value 0.001) against the kinome of *Coprinopsis cinerea*<sup>3</sup>  
764 downloaded from Kinbase (www.kinase.com). The best hits for the six species were classified  
765 into eukaryotic protein kinase (ePK) and atypical protein kinases (aPK) and their families and  
766 subfamilies as described in the hierarchical kinase classification system<sup>54</sup>.

## 767 Acknowledgements

768 The authors thank Daniel Cullen and Jill Gaskell (USDA, USA) for the strain of *Phanerochaete*  
769 used in this study. This work was supported of the Momentum Program of the Hungarian  
770 Academy of Sciences (Contract No: LP2014/12), and of the National Research, Development  
771 and Innovation Office (Grant No: GINOP-2.3.2-15-2016-00001). This project has received  
772 funding from the European Research Council (ERC) under the European Union's Horizon 2020  
773 research and innovation programme (grant agreement number 758161 and 716132). The work  
774 by the U.S. Department of Energy Joint Genome Institute, a DOE Office of Science User  
775 Facility, is supported by the Office of Science of the U.S. Department of Energy under Contract  
776 No. DE-AC02-05CH11231.

## 777 Author contributions

778 K.K. and L.G.N. conceived the study. K.K., B.K., E.A. performed fruiting experiments, RNA  
779 isolation and data analysis. B.B., I.N., J.C. obtained and analysed RNA-Seq data. Z.M., N.S.,  
780 M.V., T.K. and L.G.N. performed comparative genomic and phylogenomic analyses. S.M.  
781 analyzed the genomic context of F-box gene duplications. B.H. analyzed CAZymes. E.A. and  
782 R.A.O. analyzed transcription factors. B.H. contributed valuable analytical insights. K.B., J.J.,  
783 A.L., J.P., J.Y. Y.X. and I.V.G. sequences, assembled and annotated the genome of *Rickenella*  
784 *mellea*. L.G.N., K.K., B.B., and U.K. wrote the manuscript. D.S.H. contributed the genome of  
785 *Lentinus tigrinus* and analytical insights. All authors read and commented on the manuscript.

## 786 Data availability

787 Genome assembly and annotation of *Rickenella mellea* was deposited at DDBJ/  
788 EMBL/GenBank under the accession XXXXXX (to be provided upon publication). A Gene  
789 Expression Omnibus (GEO) archive of the sequenced *A. ostoyae* libraries was deposited in the  
790 NCBI's GEO Archive at <http://www.ncbi.nlm.nih.gov/geo> under accession SRP109671.

## 791 References

- 792 1. Kohler, A. *et al.* Convergent losses of decay mechanisms and rapid turnover of  
793 symbiosys genes in mycorrhizal mutualists. *Nat. Genet.* **47**, 410-415, (2015).
- 794 2. Kalaras, M. D., Richie, J. P., Calcagnotto, A. & Beelman, R. B. Mushrooms: A rich source  
795 of the antioxidants ergothioneine and glutathione. *Food Chem.* **233**, 429–433 (2017).
- 796 3. Stajich, J. E. *et al.* Insights into evolution of multicellular fungi from the assembled  
797 chromosomes of the mushroom *Coprinopsis cinerea* (*Coprinus cinereus*). *Proc Natl Acad*  
798 *Sci U S A* **107**, 11889–11894 (2010).
- 799 4. Ohm, R. A. *et al.* Genome sequence of the model mushroom *Schizophyllum commune*.  
800 *Nat. Biotechnol.* **28**, 957–963 (2010).
- 801 5. Kues, U. Life history and developmental processes in the basidiomycete *Coprinus*  
802 *cinereus*. *Microbiol Mol Biol Rev* **64**, 316–353 (2000).
- 803 6. Kües, U. & Navarro-González, M. How do Agaricomycetes shape their fruiting bodies? 1.  
804 Morphological aspects of development. *Fungal Biology Reviews* **29**, 63–97 (2015).
- 805 7. Nagy, L. G., Kovács, G. M. & Krizsán, K. Complex multicellularity in fungi: evolutionary  
806 convergence, single origin, or both? *Biol. Rev.* (2018). doi:10.1111/brv.12418
- 807 8. Bayry, J., Aïmanianda, V., Guijarro, J. I., Sunde, M. & Latgé, J. P. Hydrophobins-unique  
808 fungal proteins. *PLoS Pathog.* **8**, (2012).
- 809 9. Plaza, D. F., Lin, C. W., van der Velden, N. S., Aebi, M. & Kunzler, M. Comparative  
810 transcriptomics of the model mushroom *Coprinopsis cinerea* reveals tissue-specific  
811 armories and a conserved circuitry for sexual development. *BMC Genomics* **15**, 492  
812 (2014).
- 813 10. Buser, R., Lazar, Z., Käser, S., Kunzler, M. & Aebi, M. Identification, characterization, and  
814 biosynthesis of a novel N-glycan modification in the fruiting body of the basidiomycete  
815 *Coprinopsis cinerea*. *J. Biol. Chem.* **285**, 10715–10723 (2010).
- 816 11. Ohga, S., Cho, N.-S., Thurston, C. F. & Wood, D. A. Transcriptional regulation of laccase  
817 and cellulase in relation to fruit body formation in the mycelium of *Lentinula edodes* on a  
818 sawdust-based substrate. *Mycoscience* **41**, 149–153 (2000).
- 819 12. Konno, N. & Sakamoto, Y. An endo- $\beta$ -1,6-glucanase involved in *Lentinula edodes*  
820 fruiting body autolysis. *Appl. Microbiol. Biotechnol.* **91**, 1365–1373 (2011).
- 821 13. Sakamoto, Y. *et al.* *Lentinula edodes* *tlg1* encodes a thaumatin-like protein that is

- 822 involved in lentinan degradation and fruiting body senescence. *Plant Physiol.* **141**, 793–  
823 801 (2006).
- 824 14. Ohm, R. A., de Jong, J. F., de Bekker, C., Wösten, H. A. B. & Lugones, L. G.  
825 Transcription factor genes of *Schizophyllum commune* involved in regulation of  
826 mushroom formation. *Mol. Microbiol.* **81**, 1433–1445 (2011).
- 827 15. Corrochano, L. M. Fungal photoreceptors: sensory molecules for fungal development and  
828 behaviour. *Photochem. Photobiol. Sci.* **6**, 725 (2007).
- 829 16. Sipos, G. *et al.* Genome expansion and lineage-specific genetic innovations in the forest  
830 pathogenic fungi *Armillaria*. *Nat. Ecol. Evol.* **1**, 1931–1941 (2017).
- 831 17. Clémençon, H., Emmett, V. & Emmett, E. E. *Cytology and plectology of the*  
832 *Hymenomycetes with 12 tables*. (Cramer in der Gebr.-Borntraeger-Verl.-Buchh, 2012).
- 833 18. Ernst, J. & Bar-Joseph, Z. STEM: A tool for the analysis of short time series gene  
834 expression data. *BMC Bioinformatics* **7**, (2006).
- 835 19. Domazet-Lošo, T., Brajković, J. & Tautz, D. A phylostratigraphy approach to uncover the  
836 genomic history of major adaptations in metazoan lineages. *Trends in Genetics* **23**, 533–  
837 539 (2007).
- 838 20. Drost, H. G., Gabel, A., Grosse, I. & Quint, M. Evidence for active maintenance of  
839 phylotranscriptomic hourglass patterns in animal and plant embryogenesis. *Mol. Biol.*  
840 *Evol.* **32**, 1221–1231 (2015).
- 841 21. Gehrmann, T. *et al.* *Schizophyllum commune* has an extensive and functional alternative  
842 splicing repertoire. *Sci. Rep.* **6**, (2016).
- 843 22. Xie, B.-B. *et al.* Deep RNA sequencing reveals a high frequency of alternative splicing  
844 events in the fungus *Trichoderma longibrachiatum*. *BMC Genomics* **16**, 54 (2015).
- 845 23. Wang, B. *et al.* Survey of the transcriptome of *Aspergillus oryzae* via massively parallel  
846 mRNA sequencing. *Nucleic Acids Res.* **38**, 5075–5087 (2010).
- 847 24. Gordon, S. P. *et al.* Widespread polycistronic transcripts in fungi revealed by single-  
848 molecule mRNA sequencing. *PLoS One* **10**, (2015).
- 849 25. Enright, A. J., Van Dongen, S. & Ouzounis, C. A. An efficient algorithm for large-scale  
850 detection of protein families. *Nucleic Acids Res.* **30**, 1575–1584 (2002).
- 851 26. Sakamoto, Y., Nakade, K. & Konno, N. Endo- $\beta$ -1,3-Glucanase GLU1, from the fruiting  
852 body of *Lentinula edodes*, belongs to a new glycoside hydrolase family. *Appl. Environ.*  
853 *Microbiol.* **77**, 8350–8354 (2011).
- 854 27. Fukuda, K. *et al.* Purification and characterization of a novel exo-beta-1,3-1,6-glucanase  
855 from the fruiting body of the edible mushroom *Enoki* (*Flammulina velutipes*). *Biosci.*  
856 *Biotechnol. Biochem.* **72**, 3107–3113 (2008).
- 857 28. Zhou, Y., Zhang, W., Liu, Z., Wang, J. & Yuan, S. Purification, characterization and  
858 synergism in autolysis of a group of 1,3- $\beta$ -glucan hydrolases from the pilei of  
859 *Coprinopsis cinerea* fruiting bodies. *Microbiol. (United Kingdom)* **161**, 1978–1989 (2015).
- 860 29. Szeto, C. Y., Leung, G. S. & Kwan, H. S. Le.MAPK and its interacting partner, Le.DRMIP,  
861 in fruiting body development in *Lentinula edodes*. *Gene* **393**, 87–93 (2007).
- 862 30. Kersten, P. & Cullen, D. Copper radical oxidases and related extracellular  
863 oxidoreductases of wood-decay Agaricomycetes. *Fungal Genet. Biol.* **72**, 124–130  
864 (2014).
- 865 31. Rytioja, J. *et al.* Plant-Polysaccharide-Degrading Enzymes from Basidiomycetes.  
866 *Microbiol. Mol. Biol. Rev.* **78**, 614–649 (2014).
- 867 32. Tovar-Herrera, O. E. *et al.* A novel expansin protein from the white-rot fungus  
868 *Schizophyllum commune*. *PLoS One* **10**, (2015).
- 869 33. Lenfant, N. *et al.* A bioinformatics analysis of 3400 lytic polysaccharide oxidases from  
870 family AA9. *Carbohydr. Res.* **448**, 166–174 (2017).
- 871 34. Temp, U. & Eggert, C. Novel interaction between laccase and cellobiose dehydrogenase  
872 during pigment synthesis in the white rot fungus *Pycnoporus cinnabarinus*. *Appl. Environ.*

- 873 *Microbiol.* **65**, 389–395 (1999).
- 874 35. Osińska-Jaroszuk, M. *et al.* Complex biochemical analysis of fruiting bodies from newly  
875 isolated polish *Flammulina velutipes* strains. *Polish J. Microbiol.* **65**, 295–305 (2016).
- 876 36. Ji, J. & Moore, D. Glycogen metabolism in relation to fruit body maturation in *Coprinus*  
877 *cinereus*. *Mycol. Res.* **97**, 283–289 (1993).
- 878 37. Dranginis, A. M., Rauceo, J. M., Coronado, J. E. & Lipke, P. N. A Biochemical Guide to  
879 Yeast Adhesins: Glycoproteins for Social and Antisocial Occasions. *Microbiol. Mol. Biol.*  
880 *Rev.* **71**, 282–294 (2007).
- 881 38. Lugones, L. G. *et al.* Hydrophobins line air channels in fruiting bodies of *Schizophyllum*  
882 *commune* and *Agaricus bisporus*. *Mycol. Res.* **103**, 635–640 (1999).
- 883 39. Gaderer, R., Bonazza, K. & Seidl-Seiboth, V. Cerato-platanins: A fungal protein family  
884 with intriguing properties and application potential. *Applied Microbiology and*  
885 *Biotechnology* **98**, 4795–4803 (2014).
- 886 40. Martin, F., Kohler, A., Murat, C., Veneault-Fourrey, C. & Hibbett, D. S. Unearthing the  
887 roots of ectomycorrhizal symbioses. *Nat. Rev. Microbiol.* **14**, 760–773 (2016).
- 888 41. Stergiopoulos, I. & de Wit, P. J. G. M. Fungal Effector Proteins. *Annu. Rev. Phytopathol.*  
889 **47**, 233–263 (2009).
- 890 42. Feldman, D., Kowbel, D. J., Glass, N. L., Yarden, O. & Hadar, Y. A role for small secreted  
891 proteins (SSPs) in a saprophytic fungal lifestyle: Ligninolytic enzyme regulation in  
892 *Pleurotus ostreatus*. *Sci. Rep.* **7**, (2017).
- 893 43. Wang, L., Tian, X., Gyawali, R. & Lin, X. Fungal adhesion protein guides community  
894 behaviors and autoinduction in a paracrine manner. *Proc Natl Acad Sci U S A* **110**,  
895 11571–11576 (2013).
- 896 44. Pellegrin, C., Morin, E., Martin, F. M. & Veneault-Fourrey, C. Comparative Analysis of  
897 Secretomes from Ectomycorrhizal Fungi with an Emphasis on Small-Secreted Proteins.  
898 *Front. Microbiol.* **6**, 1278 (2015).
- 899 45. Liu, T. B. & Xue, C. The ubiquitin-proteasome system and F-box proteins in pathogenic  
900 fungi. *Mycobiology* **39**, 243–248 (2011).
- 901 46. Xu, G., Ma, H., Nei, M. & Kong, H. Evolution of F-box genes in plants: Different modes of  
902 sequence divergence and their relationships with functional diversification. *Proc. Natl.*  
903 *Acad. Sci.* **106**, 835–840 (2009).
- 904 47. Metzger, M. B., Pruneda, J. N., Klevit, R. E. & Weissman, A. M. RING-type E3 ligases:  
905 Master manipulators of E2 ubiquitin-conjugating enzymes and ubiquitination. *Biochimica*  
906 *et Biophysica Acta - Molecular Cell Research* **1843**, 47–60 (2014).
- 907 48. Chae, E., Tan, Q. K.-G., Hill, T. A. & Irish, V. F. An Arabidopsis F-box protein acts as a  
908 transcriptional co-factor to regulate floral development. *Development* **135**, 1235–1245  
909 (2008).
- 910 49. Pöggeler, S., Nowrousian, M., Teichert, I., Beier, A. & Kück, U. Fruiting-Body  
911 Development in Ascomycetes. in *Physiology and Genetics* 1–56 (Springer International  
912 Publishing, 2018). doi:10.1007/978-3-319-71740-1\_1
- 913 50. Dharmasiri, N. *et al.* Plant Development Is Regulated by a Family of Auxin Receptor F  
914 Box Proteins. *Dev. Cell* **9**, 109–119 (2005).
- 915 51. Pelkmans, J. F. *et al.* The transcriptional regulator c2h2 accelerates mushroom formation  
916 in *Agaricus bisporus*. *Appl. Microbiol. Biotechnol.* **100**, 7151–7159 (2016).
- 917 52. Muraguchi, H. *et al.* Strand-specific RNA-seq analyses of fruiting body development in  
918 *Coprinopsis cinerea*. *PLoS One* **10**, (2015).
- 919 53. Pelkmans, J. F. *et al.* Transcription factors of *schizophyllum commune* involved in  
920 mushroom formation and modulation of vegetative growth. *Sci. Rep.* **7**, (2017).
- 921 54. Manning, G., Whyte, D. B., Martinez, R., Hunter, T. & Sudarsanam, S. The protein kinase  
922 complement of the human genome. *Science* **298**, 1912–1934 (2002).
- 923 55. Kosti, I., Mandel-Gutfreund, Y., Glaser, F. & Horwitz, B. A. Comparative analysis of fungal



- 924 protein kinases and associated domains. *BMC Genomics* **11**, (2010).
- 925 56. Zhao, Z., Jin, Q., Xu, J. R. & Liu, H. Identification of a fungi-specific lineage of protein  
926 kinases closely related to tyrosine kinases. *PLoS One* **9**, (2014).
- 927 57. Lehti-Shiu, M. D. & Shiu, S.-H. Diversity, classification and function of the plant protein  
928 kinase superfamily. *Philos. Trans. R. Soc. B Biol. Sci.* **367**, 2619–2639 (2012).
- 929 58. Knoll, A. H. The Multiple Origins of Complex Multicellularity. *Earth Planet. Sci.* **39**, 217–  
930 239 (2011).
- 931 59. Shiu, S. H. & Bleecker, a B. Plant receptor-like kinase gene family: diversity, function,  
932 and signaling. *Sci. STKE* **2001**, re22 (2001).
- 933 60. Kunzler, M. Hitting the sweet spot-glycans as targets of fungal defense effector proteins.  
934 *Molecules* **20**, 8144–8167 (2015).
- 935 61. Schubert, M. *et al.* Plasticity of the  $\beta$ -trefoil protein fold in the recognition and control of  
936 invertebrate predators and parasites by a fungal defence system. *PLoS Pathog.* **8**,  
937 (2012).
- 938 62. Cock, J. M. *et al.* The Ectocarpus genome and the independent evolution of  
939 multicellularity in brown algae. *Nature* **465**, 617–621 (2010).
- 940 63. Sebe-Pedros, A., Degnan, B. M. & Ruiz-Trillo, I. The origin of Metazoa: a unicellular  
941 perspective. *Nat Rev Genet* **18**, 498–512 (2017).
- 942 64. Nguyen, T. A. *et al.* Innovation and constraint leading to complex multicellularity in the  
943 Ascomycota. *Nat Commun* **8**, 14444 (2017).
- 944 65. Granado, J. D., Kertesz-Chaloupková, K., Aebi, M. & Kües, U. Restriction enzyme-  
945 mediated DNA integration in *Coprinus cinereus*. *Mol. Gen. Genet. MGG* **256**, 28–36  
946 (1997).
- 947 66. Dons, J. J. M., De Vries, O. M. H. & Wessels, J. G. H. Characterization of the genome of  
948 the basidiomycete *Schizophyllum commune*. *BBA Sect. Nucleic Acids Protein Synth.* **563**,  
949 100–112 (1979).
- 950 67. Hibbett, D. S., Murakami, S. & Tsuneda, A. Hymenophore Development and Evolution in  
951 *Lentinus*. *Mycologia* **85**, 428 (1993).
- 952 68. Fries, N. Basidiospore germination in some mycorrhiza-forming hymenomycetes. *Trans.*  
953 *Br. Mycol. Soc.* **70**, 319–324 (1978).
- 954 69. Gnerre, S. *et al.* High-quality draft assemblies of mammalian genomes from massively  
955 parallel sequence data. *Proc. Natl. Acad. Sci.* **108**, 1513–1518 (2011).
- 956 70. Martin, J. *et al.* Rnnotator: An automated de novo transcriptome assembly pipeline from  
957 stranded RNA-Seq reads. *BMC Genomics* **11**, (2010).
- 958 71. Grigoriev, I. V *et al.* MycoCosm portal: Gearing up for 1000 fungal genomes. *Nucleic*  
959 *Acids Res.* **42**, (2014).
- 960 72. Robinson, M. D., McCarthy, D. J. & Smyth, G. K. edgeR: a Bioconductor package for  
961 differential expression analysis of digital gene expression data. *Bioinformatics* **26**, 139–  
962 140 (2010).
- 963 73. Robinson, M. D. & Oshlack, A. A scaling normalization method for differential expression  
964 analysis of RNA-seq data. *Genome Biol.* **11**, (2010).
- 965 74. Ritchie, M. E. *et al.* Limma powers differential expression analyses for RNA-sequencing  
966 and microarray studies. *Nucleic Acids Res.* **43**, e47 (2015).
- 967 75. Dobin, A. *et al.* STAR: Ultrafast universal RNA-seq aligner. *Bioinformatics* **29**, 15–21  
968 (2013).
- 969 76. Trapnell, C. *et al.* Transcript assembly and quantification by RNA-Seq reveals  
970 unannotated transcripts and isoform switching during cell differentiation. *Nat. Biotechnol.*  
971 **28**, 511–515 (2010).
- 972 77. Mancini, E., Iserle, J., Yanocsky, M. & Chernomoretz, A. ASpli: An integrative R package  
973 for analysing alternative splicing using RNAseq - Semantic Scholar. (2017).
- 974 78. Torruella, G. *et al.* Phylogenomics Reveals Convergent Evolution of Lifestyles in Close

- 975 Relatives of Animals and Fungi. *Curr. Biol.* **25**, 2404–2410 (2015).
- 976 79. Darling, A. E., Carey, L. & Feng, W.-C. The Design, Implementation, and Evaluation of  
977 mpiBLAST. in *ClusterWorld Conference & Expo and the 4th International Conference on*  
978 *Linux Clusters: The HPC Revolution* (2003).
- 979 80. Lombard, V., Golaconda Ramulu, H., Drula, E., Coutinho, P. M. & Henrissat, B. The  
980 carbohydrate-active enzymes database (CAZy) in 2013. *Nucleic Acids Res.* **42**, (2014).
- 981 81. Levasseur, A., Drula, E., Lombard, V., Coutinho, P. M. & Henrissat, B. Expansion of the  
982 enzymatic repertoire of the CAZy database to integrate auxiliary redox enzymes.  
983 *Biotechnol. Biofuels* **6**, (2013).
- 984 82. Ernst, J., Nau, G. J. & Bar-Joseph, Z. Clustering short time series gene expression data.  
985 *Bioinformatics* **21**, (2005).
- 986 83. Pierleoni, A., Martelli, P. & Casadio, R. PredGPI: a GPI-anchor predictor. *BMC*  
987 *Bioinformatics* **9**, 392 (2008).
- 988 84. Petersen, T. N., Brunak, S., Von Heijne, G. & Nielsen, H. SignalP 4.0: Discriminating  
989 signal peptides from transmembrane regions. *Nature Methods* **8**, 785–786 (2011).
- 990 85. Horton, P. *et al.* WoLF PSORT: Protein localization predictor. *Nucleic Acids Res.* **35**,  
991 (2007).
- 992 86. Melén, K., Krogh, A. & Von Heijne, G. Reliability measures for membrane protein  
993 topology prediction algorithms. *J. Mol. Biol.* **327**, 735–744 (2003).
- 994 87. Shelest, E. Transcription Factors in Fungi: TFome Dynamics, Three Major Families, and  
995 Dual-Specificity TFs. *Front. Genet.* **8**, 53 (2017).
- 996 88. Chen, L. *et al.* Genome Sequence of the Edible Cultivated Mushroom *Lentinula edodes*  
997 (Shiitake) Reveals Insights into Lignocellulose Degradation. *PLoS One* **11**, e0160336  
998 (2016).
- 999
- 1000

## 1001 Tables

1002 **Table 1 Conserved developmentally regulated (CAZyme) families and associated modules**

| Family        | Activity                                  | Putative FCW role/substrate                               | Conservation | Reports of role in development | Expansion in Agaricomycetes |
|---------------|-------------------------------------------|-----------------------------------------------------------|--------------|--------------------------------|-----------------------------|
| AA1_1         | Laccase                                   | crosslinking                                              | 5 (P.chr.)   | Several reports                | 7.2x10 <sup>-90</sup>       |
| AA3_1         | Cellobiose dehydrogenase                  | chitin                                                    | 5 (L.tig)    | Temp&Eggert 1990               | 9.6x10 <sup>-56</sup>       |
| AA3_2/3       | Glucose oxidase, aryl alcohol oxidase     | H <sub>2</sub> O <sub>2</sub> generation, light receptor? | 6            | This study                     | <10 <sup>-300</sup>         |
| AA5_1/2       | Glyoxal oxidase, galactose oxidase        | H <sub>2</sub> O <sub>2</sub> generation                  | 6            | This study                     | 2.2x10 <sup>-3</sup>        |
| AA9           | Lytic polysaccharide monooxygenase        | chitin                                                    | 6            | This study                     | 5.6x10 <sup>-86</sup>       |
| CBM1          | cellulose/chitin binding                  | chitin                                                    | 5 (S.com.)   | This study                     | n.s.                        |
| CBM12         | Chitin binding                            | chitin                                                    | 5 (P.chr.)   | Sakamoto et al 2017            | n.s.                        |
| CBM50         | Chitin binding                            | chitin                                                    | 5 (S.com.)   | This study                     | 1.7x10 <sup>-51</sup>       |
| CE4           | chitooligosaccharide deacetylase          | Chitin / chitosan                                         | 6            | This study                     | 6.4x10 <sup>-11</sup>       |
| CE8           | Pectin methylesterase                     | unknown                                                   | 5 (C.cin.)   | This study                     | n.s.                        |
| GH1_4         | β-glucosidase                             | glucan                                                    | 6            | This study                     | n.s.                        |
| GH3_5         | exo-β-1,3-glucanase                       | glucan                                                    | 5 (A.ost.)   | This study                     | n.s.                        |
| GH5_7         | endo-β-1,4-mannanase                      | mannose                                                   | 6            | This study                     | 4.9x10 <sup>-7</sup>        |
| GH5_15        | endo-β-1,6-glucanase                      | glucan                                                    | 5 (S.com.)   | This study                     | 2.7x10 <sup>-8</sup>        |
| GH5_49, GH5_9 | endo-β-1,6-glucanase, exo-β-1,3-glucanase | glucan                                                    | 6            | Sakamoto et al 2017            | 1.3x10 <sup>-3</sup>        |
| GH6           | Exo-β-1,4-glucanase, cellobiohydrolase    | glucan                                                    | 5 (S.com.)   | This study                     | n.s.                        |
| GH12_1        | endo-β-1,4-glucanase                      | glucan                                                    | 5 (A.ost.)   | This study                     | 2.6x10 <sup>-3</sup>        |

|           |                                                                |         |                   |                           |                        |
|-----------|----------------------------------------------------------------|---------|-------------------|---------------------------|------------------------|
| GH16      | endo- $\beta$ -1,3-1,4-glucanase                               | glucan  | 6                 | Sakamoto et al 2017       | $1.2 \times 10^{-26}$  |
| GH16_2    | endo- $\beta$ -1,3-glucanase, endo- $\beta$ -1,3-1,4-glucanase | glucan  | 5 (L.tig)         | This study                | $1.2 \times 10^{-26}$  |
| GH17      | endo- $\beta$ -1,3-glucanosyltransferase                       | glucan  | 6                 | This study                | n.s.                   |
| GH18      | chitinase                                                      | chitin  | 5 (L.tig)         | This study                | $3.6 \times 10^{-6}$   |
| GH18_5    | chitinase                                                      | chitin  | 6                 | This study                | $3.6 \times 10^{-6}$   |
| GH30_3    | endo- $\beta$ -1,6-glucosidase                                 | glucan  | 6                 | Sakamoto et al 2017       | $2.7 \times 10^{-14}$  |
| GH71      | endo- $\beta$ -1,3-glucanase                                   | glucan  | 5 (P.chr.)        | This study                | $1.6 \times 10^{-7}$   |
| GH79_1    | $\beta$ -glucuronidase                                         | unknown | 4 (P.chr. S.com.) | This study                | $1.7 \times 10^{-52}$  |
| GH92      | $\alpha$ -1,3-mannosidase                                      | mannose | 5 (S.com.)        | This study                | $2.1 \times 10^{-18}$  |
| GH128     | endo- $\beta$ -1,3-glucanase                                   | glucan  | 5 (P.chr.)        | Sakamoto et al 2017, 2011 | n.s.                   |
| GH152     | $\beta$ -1,3-glucanase, thaumatin                              | glucan  | 6                 | This study                | $2.0 \times 10^{-18}$  |
| PL5       | alginate lyase                                                 | ?       | 6                 | This study                | $9.17 \times 10^{-04}$ |
| PL14-like | alginate lyase-like                                            | ?       | 6                 | This study                | $8.5 \times 10^{-19}$  |
| Expansins | cellulose/chitin loosening                                     | chitin  | 6                 | Sipos et al 2017          | $1.5 \times 10^{-94}$  |
| Kre9/Knh1 | Glucan remodeling                                              | glucan  | 6                 | Szeto et al 2007          | $1.5 \times 10^{-05}$  |

1003 Only families that are developmentally regulated in 5 or 6 species are shown (except GH79). Conservation of the  
 1004 developmental regulation is given as the number of species in which a given family is developmentally regulated  
 1005 followed by the name(s) of species in which there were no developmentally regulated members. Gene family  
 1006 expansion in the Agaricomycetes was tested by a Fisher exact test, and considered significant at  $P < 0.05$ . For the  
 1007 Kre9/Knh1 family, P-value refers to the overrepresentation of the corresponding InterPro domain.
